# 1 An early Cambrian polyp reveals an anemone-like 2 ancestor for medusozoan cnidarians

3  
4 Yang Zhao<sup>1,2</sup>, Luke A. Parry<sup>3\*</sup>, Jakob Vinther<sup>2,4</sup>, Frances S. Dunn<sup>5</sup>, Yu-jing Li<sup>6</sup>, Fan Wei<sup>1,6</sup>,  
5 Xian-guang Hou<sup>1</sup> & Pei-yun Cong<sup>1\*</sup>

6 <sup>1</sup>Yunnan Key Laboratory for Palaeobiology & MEC International Joint Laboratory for  
7 Palaeobiology and Palaeoenvironment, Institute of Palaeontology, Yunnan University, Kunming  
8 650500, China;

9 <sup>2</sup>School of Earth Sciences, University of Bristol, Queens Road, Bristol BS8 1RJ, UK;

10 <sup>3</sup>Department of Earth Sciences, University of Oxford, 3 South Parks Road, Oxford OX1 3AN,  
11 UK;

12 <sup>4</sup>School of Biological Sciences, University of Bristol, 24 Tyndall Avenue, Bristol BS8 1TQ, UK;

13 <sup>5</sup>Oxford University Museum of Natural History, Parks Rd, Oxford OX1 3PW

14 <sup>6</sup>State Key Laboratory of Palaeobiology and Stratigraphy, Nanjing Institute of Geology and  
15 Palaeontology, Chinese Academy of Sciences, Nanjing 210008, China

16 \*Corresponding authors: Luke A. Parry, Pei-yun Cong

17 **Email:** [luke.parry@seh.ox.ac.uk](mailto:luke.parry@seh.ox.ac.uk), [cong@ynu.edu.cn](mailto:cong@ynu.edu.cn)

## 18 **Abstract**

19 Extant cnidarians are a disparate phylum of non-bilaterians and their  
20 diploblastic body plan represents a key step in animal evolution. Anthozoans  
21 (anemones, corals) are benthic polyps, while adult medusozoans (jellyfishes)  
22 are dominantly pelagic medusae. A sessile polyp is present in both groups and  
23 is widely conceived as the ancestral form of their last common ancestor.  
24 However, the nature and anatomy of this ancestral polyp, particularly of  
25 medusozoans, are controversial, owing to the divergent body plans of both  
26 groups in the extant lineages and the rarity of medusozoan soft tissues in the  
27 fossil record. Here we redescribe the enigmatic *Conicula striata* Luo et Hu from  
28 the early Cambrian Chengjiang biota, south China, which has previously been  
29 interpreted as a polyp, lophophorate or deuterostome. We show that *C. striata*  
30 possessed features of both anthozoans and medusozoans. Its stalked polyp  
31 and fully encasing conical, annulated organic skeleton (periderm) are features  
32 of medusozoans. However, the gut is partitioned by ~28 mesenteries, and has  
33 a tubular pharynx, resembling anthozoans. Our phylogenetic analysis recovers  
34 *C. striata* as a stem medusozoan, indicating that the enormously diverse  
35 medusozoans were derived from an anemone-like ancestor, with the pharynx

36 lost and number of mesenteries reduced prior to the origin of crown group  
37 Medusozoa.

38 **Keywords:** Cnidaria, Medusozoa, early Cambrian, Chengjiang biota

### 39 **Introduction**

40 Among non-bilaterian animals, Cnidaria is the phylum with the most species  
41 richness as well as the most disparate range of morphologies (**Daly et al.,**  
42 **2007**). Members of Cnidaria share the presence of tentacles with stinging cells  
43 (cnidocytes) used in prey capture, a blind gastric cavity that is often partitioned  
44 by mesenteries/septa and a sessile polypoid phase in at least part of their  
45 lifecycle in most groups (**Hyman, 1940**). The phylum mainly includes two  
46 monophyletic subgroups: Anthozoa and Medusozoa (**Marques and Collins,**  
47 **2004; Schuchert, 1993**). Anthozoans are primarily benthic, polypoid animals  
48 encompassing widely known groups such as sea anemones and corals  
49 (**Brusca et al., 2016**), whereas medusozoans usually have a biphasic lifestyle,  
50 with sessile polyps giving rise to swimming medusae (jellyfishes) via asexual  
51 reproduction (**Collins, 2002**). Interpretations of cnidarian phylogeny support a  
52 scenario in which the common ancestor of the crown group was a sessile polyp,  
53 and the swimming medusa represents a synapomorphy of Medusozoa (**Collins**  
54 **et al., 2006; Kayal et al., 2018; Marques and Collins, 2004; McFadden et**  
55 **al., 2021**). However, the anatomy of the polyps diverges in living anthozoans  
56 and medusozoans in several respects (**Daly et al., 2007; Technau and Steele,**  
57 **2011**), rendering the inference of their ancestral forms uncertain.

58 Anthozoan polyps possess a tubular pharynx (actinopharynx) that  
59 extends from the mouth to a gastric cavity that is partitioned by well-developed  
60 mesenteries (**Daly et al., 2007**). The pharynx contains either one or two ciliated  
61 siphonoglyphs that impart a bilateral/biradial symmetry (**Malakhov, 2016**). In  
62 contrast, medusozoan polyps are relatively small and possess an exoskeleton  
63 called periderm, most of which are made of chitin (**Mendoza-Becerril et al.,**  
64 **2016**). This organic skeleton can encase the entire body of the polyp in some  
65 lineages such as coronate Scyphozoa, or be reduced to just the basal portion  
66 of the polyp (**Mendoza-Becerril et al., 2016**). In medusozoan polyps, the mouth  
67 is usually extended away from the body on a protuberance referred to as the  
68 scyphopharynx or hypostome in different subgroups. The gastric cavity is not  
69 always partitioned by septa, as they are absent in the main subclades of  
70 hydropolyps (**Bouillon and Boero, 2000**) and cubopolyps (**Chapman, 1978**).

71 Molecular clock estimates suggest that the cnidarian crown groups  
72 radiated in the Ediacaran or the Cryogenian (**dos Reis et al., 2015; Park et al.,**

73 **2012**), but cnidarian fossils before the Cambrian are rare and/or controversial  
74 (**Liu et al., 2014; Van Iten et al., 2014; Van Iten et al., 2016**). Cambrian  
75 deposits, however, yield a wealth of cnidarian fossils that exceptionally  
76 preserved delicate soft tissues (**Cartwright et al., 2007; Conway Morris, 1993;**  
77 **Han et al., 2016; Hou et al., 2005**) and even their early developmental stages  
78 (**Dong et al., 2016**), and are therefore crucial to understand the origin and early  
79 evolution of cnidarian clades. Here, we redescribe the enigmatic *Conicula*  
80 *striata* Luo et Hu (**Luo et al., 1999**) from the Cambrian (Epoch 2, Age 3)  
81 Chengjiang biota from Yunnan Province, south China. *C. striata* has previously  
82 been interpreted as a lophophorate (spiralian) (**Luo et al., 1999**), an actinarian  
83 (cnidarian) (**Hu, 2005**) or a phlogitid (presumed deuterostome) (**Caron et al.,**  
84 **2010**). However, with only one specimen reported, *C. striata* has remained as  
85 one of the most poorly understood early Cambrian fossils. In this study, we  
86 depict the detailed morphology of *C. striata* based 51 exquisitely preserved  
87 specimens, revealing mosaic morphological characteristics as seen in both  
88 extant anthozoans and medusozoans. These features bring *C. striata* in the  
89 stem of Medusozoa, unveiling the earliest medusozoan polyp as an anemone-  
90 like form encased in an extensive periderm.

## 91 **Results**

### 92 **Systematic Palaeontology**

93 Phylum Cnidaria Verrill, 1865

94 Stem group Medusozoa Petersen, 1979

95 *Conicula striata* Luo et Hu, 1999

96 (Figures 1-3, S1-S7)

97 **Occurrence.** *Conicula striata* occurs in Cambrian Series 2, Stage 3, the local  
98 lithostratigraphic unit is the Yu'anshan Member of the Chiungchussu Formation,  
99 corresponding to the *Eoredlichia-Wutingaspis* trilobite biozone (**Babcock and**  
100 **Zhang, 2001**).

101 **Amended diagnosis** (amended from **Luo et al., 1999**, p. 87). Solitary polypoid  
102 cnidarian encased in a conical, annulated periderm. The polyp possesses  
103 unbranched, flexible circumoral tentacles that can protrude outwards from the  
104 distal end of the periderm, and a blind digestive tract consisting of an elongate,  
105 tubular pharynx and a mesentery-partitioned gastric cavity.

106 **Description.**

107 Specimens of *Conicula striata* usually exhibit a conical shape in lateral view  
108 (Figures 1, S1, and S2) and occasionally a circular cross section in oblique-  
109 lateral view (Figure S3). The body is 10-38 mm long with maximum width  
110 ranging between 4-17 mm (width/length ratio among complete specimens is  
111 0.38-0.45). Some specimens preserve evidence of both a rigid, external  
112 skeleton (periderm) (Figure 2), circumoral tentacles (Figure 3A-C) and a  
113 columnar body with internal anatomical features (Figure 3D-E, G-H, J-L).

114 The external skeleton appears to have been originally inflexible and  
115 robust, and fully encloses the aboral portion of the body ("Pd", Figures 2A, C,  
116 D and S2D-F). The skeleton forms a conical structure in the proximal portion,  
117 which during growth expanded and then narrowed to form a globular chamber,  
118 resulting in a shape resembling a classic, well-loaded ice cream cone. It is  
119 ornamented by parallel annulations ("Al", Figure 2A-C), with slight relief under  
120 low angle light (Figures 2C and S1D) which are most visible in the aboral  
121 section. The space between adjacent annulations is around 0.2-0.4 mm. The  
122 appearance of the exoskeleton is consistent with the periderm of medusozoan  
123 cnidarians. Dark, spine-like structures project into the interior of the periderm.  
124 They are arranged in one whorl and surround internal features, particularly the  
125 region housing the digestive tract, and are termed here as peridermal teeth  
126 ("Pt", Figures 2D-I, S2A, and S6E-G).

127 Soft tentacles are exhibited at the distal part of the body ("Te", Figures  
128 1F, H, J, 3A-C, and S1E, F), either approximately straight (e.g. Figure 1H) or  
129 curved (e.g. Figure 1F, J) and vary in aspect ratio, suggesting that they were  
130 capable of protruding and retracting. The tentacles are smooth, with no  
131 identifiable branches or pinnules (Figures 3A-C and S1E, F). When present, the  
132 tentacles are buckled and intertwined as a dark organic-rich mass within the  
133 globular chamber, making it difficult to trace each tentacle (Figures 1A-E, S2C,  
134 E, F, S5B, and S6A-D). It is challenging to surmise the total number of tentacles  
135 due to twisting and/or superposition of multiple tentacles as well as incomplete  
136 exposure and varying degrees of decay.

137 The tentacle base surrounds a disc with a central dark, tongue-shaped  
138 structure, likely representing the mouth opening ("Mo", Figures 1D, E and S5C,  
139 D). An elongate, narrow tubular structure (about 6.5 mm and 7.7 mm long in  
140 YKLP 13484a and 13485a, respectively) connects the opening to the lower part  
141 of the body ("Ph", Figures 1F-K, 3D, E, and S5E-H), in which an oval-shaped  
142 structure with a dark outline expands to near the body margin ("Gc", Figures 1,  
143 3D, E, and S5G, H). The tapering band and oval-shaped structure are distinct



144 from other regions by their preservation in a red-brown or dark colour when  
145 viewed with cross-polarised light or fluorescence microscopy, respectively  
146 (Figures 3D, E, S3A, D, S4D, E, and S5G, H), and their higher amounts of  
147 carbon and iron in elemental maps (Figures S4F, G, S6E, G, and S7F, G). The  
148 tubular structure and oval-shaped structure are interpreted as a pharynx and a  
149 gastric cavity, respectively, based on their shape, size and position within the  
150 animal body (Figure 3F, I).

151 The gastric cavity varies in size and shape in different specimens, but  
152 frequently preserves evidence that was partitioned by dark, longitudinal lines  
153 (“Me”, Figures 3G, H, S2C, S3A-C, S4A-F, and S6A-D). In YKLP 13212a, these  
154 dark lines are nearly parallel with each other and extend from the base of the  
155 oval-shaped structure to the distal region of the columnar body (Figures 3G, H  
156 and S4D-F). The spacing between two adjacent lines in the central region is  
157 ~0.39 mm, suggesting a total of 28 mesenteries or so (calculated by dividing  
158 this interval by the body circumference  $\approx$  11.3 mm). However, dark lines are  
159 sometimes inconspicuous, with some superposition from either side of the  
160 body, making their precise number difficult to determine across specimens.  
161 These dark lines are carbonaceous in preservation (Figure 3H) and interpreted  
162 as mesenteries/gastric septa according to their appearance and position  
163 (Figure 3I).

164 A further dark patch, with a circular, crescent or triangular outline,  
165 attaches at the base of the gastric cavity (“Pc”, Figures 1 and S2). It contains a  
166 high abundance of carbon as revealed by elemental maps (Figure S6H, I). A  
167 slightly curved, narrower ribbon-like structure (“Pe”, Figures 1A, D, F, 3J, L, and  
168 S4A-C), sometimes with modest relief (Figure 3L), protrudes from the bottom  
169 of the dark patch to the proximal end of the periderm (e.g. YKLP 13212 and  
170 13288). In YKLP 13212, it is roughly parallel sided (~0.34 mm wide), and  
171 contains abundant weathered pyrite granules (Figure 3K). The dark patch and  
172 ribbon-like structure are herein interpreted as a peduncle chamber and a  
173 peduncle, respectively.

## 174 **Phylogenetic position**

175 Our phylogenetic analysis incorporating *Conicula striata* includes 99 taxa and  
176 304 characters scored for a diversity of living and fossil cnidarians and  
177 outgroups. Analysis of this dataset without any topological constraints recovers  
178 *C. striata* in the medusozoan stem group and all other tubular fossils in a clade  
179 that is in a polytomy with extant medusozoan taxa (Figures 4C and S8A). When  
180 removing these tubular fossils, *C. striata* is still recovered in the medusozoan

181 stem group while extant medusozoan taxa are monophyletic (Figure S8B). This  
182 analysis also recovers the paraphyly of Scyphozoa, a result that is not found in  
183 recent molecular phylogenies but has been found in many recent morphological  
184 phylogenies (**Duan et al., 2017; Zhao et al., 2019**). Constraining the in-group  
185 relationships of cnidarians still recovers *C. striata* in the stem group of  
186 Medusozoa (Figure S8C).

## 187 Discussion

### 188 ***C. striata* is a stem medusozoan with a mixed anthozoan-medusozoan** 189 **body plan**

190 *Conicula striata* was erected in 1999 based on one incomplete specimen  
191 preserving a tentacular, annulated conical body (**Luo et al., 1999**). It has since  
192 been variously interpreted as a lophophorate (**Luo et al., 1999**), a sea anemone  
193 (**Hu, 2005**) or a deuterostome (**Caron et al., 2010**). Our 51 new specimens  
194 corroborate the validity of this genus and further provide new insights into its  
195 morphology, phylogenetic position and evolutionary significance. *C. striata*  
196 possesses an expansive, partitioned gastric cavity with a single opening (Figure  
197 3D-E, G-H), unbranched, circumoral tentacles (Figure 1F, H, J) and a radially  
198 symmetrical body (Figure S3). These characters are incompatible with the  
199 previous interpretations as either a lophophorate or a deuterostome.  
200 Lophophorates possess a U-shaped gut (with a mouth and an anus) that is  
201 often conspicuously preserved in Chengjiang fossils (**Zhang et al., 2013**).  
202 Although blind guts are present in articulate brachiopods, *C. striata* shares no  
203 derived characters with brachiopods in any aspect of body construction.  
204 Cambroernids (presumed deuterostomes), a fossil group including  
205 *Herpetogaster*, phlogitids and eldoniids (**Caron et al., 2010**), also differ  
206 markedly as they have bilaterally arranged, paired, branched, even dendritic  
207 tentacles and a discrete, through gut (**Caron et al., 2010; Hou et al., 2006**).

208 The regular, longitudinal dark lines preserved in association to the  
209 columnar body wall and the gastric cavity (Figure 3G, H) are interpreted as  
210 mesenteries. Similar structures have been identified in Cambrian exceptionally  
211 preserved fossils before, such as *Archisaccophyllia* (**Hou et al., 2005**) and  
212 some dinomischids (**Zhao et al., 2019**). Partitioning of the gastric cavity by  
213 mesenteries/septa is a widespread character in extant cnidarian polyps (Figure  
214 3I) (**Daly et al., 2007**), with a higher number (at least 8) of well-developed  
215 mesenteries occurring in anthozoans while only 4 present in scyphopolyps and  
216 stauropolyps. In hydro-polyps (**Bouillon and Boero, 2000**) and cubopolyps  
217 (**Chapman, 1978**) gastric septa are absent. The number of mesenteries

218 observed in *C. striata* (~28) is consistent with that in anthozoans. The elongate  
219 tubular structure of *C. striata* that extends from the gastric cavity to the oral disc  
220 and mouth corresponds in size and topological position to the actinopharynx of  
221 anthozoans (Figure 3D-F) (**Daly et al., 2003; Daly et al., 2007**), but is different  
222 from the scyphopharynx/hypostome of medusozoans which is an oral extension  
223 at the distal end of the body. The digestive system of *C. striata* therefore closely  
224 resembles the condition seen in extant anthozoans.

225 The exoskeleton preserves regularly arranged annulations in the  
226 proximal portion in some specimens (Figures 2A-C and S1A-D). While  
227 compaction could have enhanced their relief, they are unlikely to be artefactual  
228 due to the common occurrence across specimens. Such annulations resemble  
229 the growth lines caused by the marginal accretion of an exoskeleton, which are  
230 widely present in extant cnidarians (e.g. medusozoan periderm) and spiralians  
231 (such as molluscs, brachiopods and tubular polychaetes). Given that the  
232 polypoid body and internal structures of *C. striata* deviate from the body plans  
233 of bilaterians, we limit comparisons of the skeleton to those of cnidarians.  
234 Anthozoans also produce skeletons, which are found in living antipatharians,  
235 ceriantharians, scleractinians and octocorallians, and extinct rugose and  
236 tabulate corals, but presumably have multiple independent origins. Among  
237 these, *C. striata* only superficially resembles the ceriantharians, which produce  
238 tubes made of mucus and ptychocysts (**Stampar et al., 2015**). The accretionary  
239 exoskeleton of *C. striata* is directly comparable to the periderm of medusozoans  
240 and we infer that these features are homologous.

241 The dark, spine-like structures (Figure 2D-I) that encircle the basal  
242 portion of the columnar body are interpreted as the remains of peridermal teeth.  
243 Extant coronate polyps possess well-developed whorls of complex peridermal  
244 teeth, which are protrusions of the inner layer of the periderm towards the  
245 central chamber, to anchor the polypoid body (**Jarms, 1991**). Similar peridermal  
246 teeth also appear in tubular fossils as sheet-like ridges (cusps) in *Sphenothallus*  
247 (**Dzik et al., 2017**) or paired projections in *Olivoooides* (**Dong et al., 2016**).  
248 These peridermal teeth are often repeated along the length of the tube wall  
249 (**Jarms, 1991**), but in *C. striata* they occur in a single whorl towards the aboral  
250 end of the tube, with the remainder of the lumen of the skeleton appearing  
251 smooth. In addition, the interpreted peduncle might also function for anchoring  
252 the polypoid body inside the theca, along with the peridermal teeth. In colonial  
253 hydro-polyps, peduncle-like structures connect individual polyps together  
254 (**Cartwright, 2004**) and are therefore not readily comparable with that seen in  
255 *C. striata*.

256 *C. striata* is inferred here to have been a solitary organism with an  
257 annulated periderm fully encasing the polyp, evidencing a benthic and sessile  
258 lifestyle commonly seen among coronate and hydrozoan polyps. However, all  
259 specimens lack a holdfast at the aboral end and instead appear to taper  
260 naturally, with no evidence of attachment to other organisms or substrates,  
261 suggesting *C. striata* may have embedded the apex into the seafloor for  
262 anchoring, similar to some conulariids (**Van Iten et al., 2013**). Alternatively, *C.*  
263 *striata* may have been recumbent, but the conical skeleton does not curve to  
264 facilitate such a mode of life like that of horn corals (**Scrutton, 1998**). An  
265 alternative less plausible scenario is that *C. striata* was planktonic, with  
266 buoyancy provided by the inflated distal chamber, possibly having an  
267 intermediate lifestyle between the benthic polyps and pelagic medusae.

## 268 **Evolutionary significance**

269 Historically, many tubular fossils from the Ediacaran-Cambrian have been  
270 interpreted as cnidarian polyps (Table S1)(**Van Iten et al., 2014**), such as the  
271 microfossils Olivooidea, Carinachitidae and Hexangulaconulariidae(**Guo et al.,**  
272 **2020**) as well as macrofossils *Corumbella* and conulariids(**Van Iten et al.,**  
273 **2016**). The features revealed in these tubular fossils, such as radial symmetry,  
274 transverse ribs/crests, peridermal teeth and a single opening, are the primary  
275 lines of evidence for a cnidarian interpretation, with particularly close  
276 comparisons made to the peridermal tubes of medusozoan polyps(**Conway**  
277 **Morris and Chen, 1992; Dong et al., 2016; Van Iten et al., 2006; Zhu et al.,**  
278 **2000**). Soft tissues are extremely scarce among these fossil tubes, and their  
279 cnidarian affinities and interpretations are accordingly not without previous  
280 controversy(**Steiner et al., 2014; Walde et al., 2019**). They are recovered as a  
281 paraphyletic grade of total group medusozoans in our Bayesian analyses  
282 (Figures 4C, S8). *C. striata* not only shares with those tubular fossils similar  
283 exoskeletal features, but also provides unique new evidence for the soft tissues  
284 of early medusozoans, such as mesenteries, the digestive tract and tentacles,  
285 characters that are not available from the overwhelming majority of tubular  
286 fossil taxa, shedding light on character state changes that occurred early in  
287 medusozoan evolutionary history.

288 *C. striata* shows a tubular pharynx, which is similar to the actinopharynx  
289 of anthozoans in topological location, inferred function and architecture (Figure  
290 3D-F). The presence of an anthozoan-like pharynx in the medusozoan stem  
291 group is also supported in our ancestral state reconstruction (Figure 4C). It is  
292 recovered as a plesiomorphic trait of cnidarians (Figure 4C), indicating that the

293 tubular pharynx in the stem group of Medusozoa is homologous with the  
294 actinopharynx in anthozoans, but it was subsequently lost prior to the origin of  
295 crown group medusozoans. Whether other tubular fossil taxa have an  
296 anthozoan-like pharynx is not known, which would depend on further findings  
297 of soft tissues in these groups. Moreover, *C. striata* possesses about twenty-  
298 eight mesenteries lining the gastric cavity, a feature commonly seen in extant  
299 hexacorallians, which is also recovered as being plesiomorphic for  
300 medusozoans and cnidarians in our analysis (Figure 4C).

301 We infer that the periderm is a true medusozoan  
302 synapomorphy (**Mendoza-Becerril et al., 2016**), but is absent in the common  
303 ancestor of Anthozoa, and probably of Cnidaria (Figure 4C). This inference is  
304 in congruence with earlier cnidarian fossils from the Ediacaran-Cambrian, in  
305 which all potential medusozoan polyps share a well-developed, annulated  
306 exoskeleton (periderm). In contrast, all known anthozoan fossil taxa lack a  
307 comparable exoskeleton/periderm (**Han et al., 2010; Hou et al., 2005**). A polyp  
308 encased fully by a periderm is recovered as a plesiomorphic trait of the  
309 medusozoan total group (Figure 4C) and this is only retained in living coronates  
310 and some members of Hydrozoa.

311 In light of this, we reconstruct the ancestral medusozoan as an  
312 anemone-like polyp, which possessed a tubular pharynx (actinopharynx)  
313 connecting the mouth and gastrovascular cavity that is partitioned by ~28  
314 mesenteries and unbranched tentacles, with the body encased fully by an  
315 annulated exoskeleton (periderm) (Figure 4A, B). The body plan of *C. striata*  
316 bridges the long-known morphological gap between living anthozoan and  
317 medusozoan polyps (Figure 4D), suggesting that several features previously  
318 regarded as anthozoan apomorphies (e.g. an actinopharynx) might have a  
319 deeper origin and are shared by stem medusozoans.

320 Given the anatomical simplicity in crown medusozoan polyps (**Ruppert  
321 et al., 2004**), we infer that several characters, including well-developed  
322 mesenteries and a tubular pharynx, experienced subsequent reduction and  
323 even total loss in some or all extant medusozoan lineages (Figure 4D). Only a  
324 few living medusozoan polyps (e.g. coronate scyphozoans) have a well-  
325 developed periderm and it is completely restricted to the lower body or podocyst  
326 in some lineages (e.g. staurozoans) (**Mendoza-Becerril et al., 2016**). Our  
327 analyses indicate that this is also the result of secondary reduction and a  
328 component of a broader trend of polyp simplification in Medusozoa where the  
329 lifecycle is now dominated by the medusa stage.



330

## 331 **Materials and Methods**

### 332 **Materials**

333 51 specimens were collected in fieldwork from 2014 to 2019 in Haikou area,  
334 Kunming, eastern Yunnan province, south China. They were checked and  
335 prepared under a Leica M205C stereomicroscope. A fine needle was used to  
336 remove the matrix and expose the fossils. The specimen size was measured  
337 with ImageJ 1.51j8. All specimens are housed in the Yunnan Key Laboratory  
338 for Palaeobiology (YKLP), Yunnan University, China. The holotype (He-f-6-5-  
339 112/113) is deposited in the Yunnan Institute of Geological Survey, Kunming,  
340 China.

### 341 **Photography**

342 16 out of 51 specimens were figured. Photographs were taken either by a  
343 Canon EOS 5DS R digital camera mounted with Canon MP-E 100mm or 65mm  
344 macro lens (1-5X), using high/low angle cross-polarised light, or by a Leica DFC  
345 5000 camera mounted on Leica M205C microscope (to obtain morphological  
346 details). Interpretative drawings were combined with camera lucida drawings  
347 done under Nikon SMZ1000 stereomicroscope and digital photographs.  
348 Fluorescence images were obtained using a Leica DFC7000 T digital camera  
349 linked to a Leica M205 FA fluorescence microscope. All figures were processed  
350 in Adobe Photoshop CC 2019 to adjust the levels, brightness and contrast. The  
351 reconstruction of the body plan was drafted in Adobe Illustrator CC 2019.

### 352 **Scanning electron microscopy (SEM)**

353 SEM images were collected by a FEI Quanta 650 FEG in low-vacuum mode  
354 using an accelerating voltage of 15kV (30kV in Figure S7F). Elemental  
355 composition analyses were carried out with an EDAX Pegasus using  
356 accelerating voltages of 15kV (10kV in Figure S6I). All above analyses were  
357 performed in the Institute of Palaeontology, Yunnan University.

### 358 **Phylogenetic analysis**

359 Phylogenetic analyses were performed in MrBayes 3.2.7 (**Ronquist et al.,**  
360 **2012**) under the mkv + gamma model (**Lewis, 2001**). 20,000,000 generations  
361 were requested, with analyses stopping automatically once the average  
362 deviation of split frequencies was <0.01. Ancestral character states for selected  
363 nodes were reconstructed in separate analyses using monophyly constraints



364 also performed in MrBayes 3.2.7. Posterior probabilities for the character states  
365 at these nodes are plotted as pie charts at nodes shown in Figure 4C.

366

### 367 **Supplementary information**

368 Supplementary information includes eight figures, one table and phylogenetic  
369 information (character descriptions and codes).

### 370 **Acknowledgments**

371 We thank Qiang Ou (China University of Geosciences, Beijing) and Shixue Hu  
372 (Chengdu Center, China Geological Survey) for their insightful comments and  
373 suggestions, and Karen E. Sanamyan (Kamchatka Branch of Pacific  
374 Geographical Institute) for sharing extant sea anemones images in Figure 3F,  
375 I, along with Mengying Yin for creating the 3D model in Figure 4B, and  
376 Shangnan Zhang for her help with SEM analyses. This work was supported by  
377 the National Natural Science Foundation of China (42072019 and 42062001 to  
378 P.-Y.C. and F.W.), the Strategic Priority Research Program of Chinese  
379 Academy of Sciences (XDB26000000 to P.-Y.C. and Y.-J.L.) and State Key  
380 Laboratory of Palaeobiology and Stratigraphy (Nanjing Institute of Geology and  
381 Palaeontology, CAS) (193128 and 213111 to F.W. and Y.-J.L.). Y.Z. is  
382 supported by a graduate grant from China Scholarship Council  
383 (201907030012). F.S.D. is supported by fellowships from Merton College and  
384 1851. L.A.P. is supported by an early career fellowship from St Edmund Hall.

### 385 **Author contributions**

386 Y.Z. and P.-Y.C. designed research; Y.Z., P.-Y.C., X.-G.H., Y.-J.L. and F.W.  
387 collected fossil material; Y.Z., L.A.P. and J.V. performed research, analysed  
388 data and prepared all figures; Y.Z., F.S.D and L.A.P collated the  
389 morphological data and conducted phylogenetic analyses; Y.Z. and L.A.P.  
390 wrote the initial manuscript with significant input from J.V., P.-Y.C. and all  
391 other co-authors.

### 392 **Declaration of interests**

393 The authors declare no competing interests.

394

395

## 396 References

- 397 **Babcock LE**, Zhang W. 2001. Stratigraphy, palaeontology, and depositional setting of the  
398 Chengjiang Lagerstätte (Lower Cambrian), Yunnan, China. *Palaeoworld* **13**:66–86.
- 399 **Bouillon J**, Boero F. 2000. The hydrozoa: a new classification in the lighth of old knowledge.  
400 *Thalassia Salentina* **24**:3-45. doi: 10.1285/i15910725v24p3.
- 401 **Brusca RC**, Moore W, Shuster SM. 2016. *Invertebrates, 3rd edn*. Sinauer Associates,  
402 Sunderland, Massachusetts.
- 403 **Caron J-B**, Conway Morris S, Shu D. 2010. Tentaculate fossils from the Cambrian of Canada  
404 (British Columbia) and China (Yunnan) interpreted as primitive deuterostomes. *PloS One*  
405 **5**:e9586. doi: 10.1371/journal.pone.0009586.
- 406 **Cartwright P**. 2004. The development and evolution of hydrozoan polyp and colony form.  
407 *Hydrobiologia* **530-531**:309–317. doi: 10.1007/s10750-004-2639-7.
- 408 **Cartwright P**, Halgedahl SL, Hendricks JR, Jarrard RD, Marques AC, Collins AG, Lieberman  
409 BS. 2007. Exceptionally preserved jellyfishes from the Middle Cambrian. *PloS One*  
410 **2**:e1121. doi: 10.1371/journal.pone.0001121.
- 411 **Chapman DM**. 1978. Microanatomy of the cubopolyp, *Tripedalia cystophora* (Class Cubozoa).  
412 *Helgoländer wissenschaftliche Meeresuntersuchungen* **31**:128–168.  
413 doi: 10.1007/BF02296994.
- 414 **Collins AG**. 2002. Phylogeny of Medusozoa and the evolution of cnidarian life cycles. *Journal*  
415 *of Evolutionary Biology* **15**:418–432. doi: 10.1046/j.1420-9101.2002.00403.x.
- 416 **Collins AG**, Schuchert P, Marques AC, Jankowski T, Medina M, Schierwater B. 2006.  
417 Medusozoan phylogeny and character evolution clarified by new large and small subunit  
418 rDNA data and an assessment of the utility of phylogenetic mixture models. *Systematic*  
419 *Biology* **55**:97–115. doi: 10.1080/10635150500433615.
- 420 **Conway Morris S**. 1993. Ediacaran-like fossils in Cambrian Burgess Shale-type faunas of  
421 North America. *Palaeontology* **36**:593–635.
- 422 **Conway Morris S**, Chen M. 1992. Carinachitids, hexangulaconulariids, and *Punctatus*:  
423 problematic metazoans from the Early Cambrian of South China. *Journal of Paleontology*  
424 **66**:384–406. doi: 10.1017/S0022336000033953.
- 425 **Daly M**, Brugler MR, Cartwright P, Collins AG, Dawson MN, Fautin DG, France SC,  
426 McFadden CS, Opresko DM, Rodriguez E, Romano SL, Stake JL. 2007. The phylum  
427 Cnidaria: a review of phylogenetic patterns and diversity 300 years after Linnaeus. *Zootaxa*  
428 **1668**:127–182. doi: 10.11646/zootaxa.1668.1.11.
- 429 **Daly M**, Fautin DG, Cappola VA. 2003. Systematics of the Hexacorallia (Cnidaria: Anthozoa).  
430 *Zoological Journal of the Linnean Society* **139**:419–437. doi: 10.1046/J.1096-  
431 3642.2003.00084.X.
- 432 **Dong X-P**, Vargas K, Cunningham JA, Zhang H, Liu T, Chen F, Liu J, Bengtson S, Donoghue  
433 PCJ. 2016. Developmental biology of the early Cambrian cnidarian *Olivoooides*.  
434 *Palaeontology* **59**:387–407. doi: 10.1111/pala.12231.

- 435 **dos Reis M**, Thawornwattana Y, Angelis K, Telford MJ, Donoghue PCJ, Yang Z. 2015.  
436 Uncertainty in the timing of origin of animals and the limits of precision in molecular  
437 timescales. *Current Biology* **25**:2939–2950. doi: 10.1016/j.cub.2015.09.066.
- 438 **Duan B**, Dong X-P, Porras L, Vargas K, Cunningham JA, Donoghue PCJ. 2017. The early  
439 Cambrian fossil embryo *Pseudoooides* is a direct-developing cnidarian, not an early  
440 ecdysozoan. *Proceedings of the Royal Society B: Biological Sciences* **284**:20172188.  
441 doi: 10.1098/rspb.2017.2188.
- 442 **Dzik J**, Baliński A, Sun Y. 2017. The origin of tetradial symmetry in cnidarians. *Lethaia*  
443 **50**:306–321. doi: 10.1111/let.12199.
- 444 **Guo J**, Han J, Van Iten H, Song Z, Qiang Y, Wang W, Zhang Z, Li G, Sun Y, Sun J. 2020. A  
445 new tetradial olivoid (Medusozoa) from the lower Cambrian (Stage 2) Yanjiahe  
446 Formation, South China. *Journal of Paleontology* **94**:457–466. doi: 10.1017/jpa.2019.101.
- 447 **Han J**, Hu S, Cartwright P, Zhao F, Ou Q, Kubota S, Wang X, Yang X. 2016. The earliest  
448 pelagic jellyfish with rhopalia from Cambrian Chengjiang Lagerstätte. *Palaeogeography,*  
449 *Palaeoclimatology, Palaeoecology* **449**:166–173. doi: 10.1016/j.palaeo.2016.02.025.
- 450 **Han J**, Kubota S, Uchida H, Stanley GD, Jr., Yao X, Shu D, Li Y, Yasui K. 2010. Tiny sea  
451 anemone from the lower Cambrian of China. *PloS One* **5**:e13276.  
452 doi: 10.1371/journal.pone.0013276.
- 453 **Hou X-G**, Bergström J, Ma X-Y, Zhao J. 2006. The Lower Cambrian *Phlogites* Luo & Hu re-  
454 considered. *GFF* **128**:47–51. doi: 10.1080/11035890601281047.
- 455 **Hou X-G**, Stanley GD, Jr., Zhao J, Ma X-Y. 2005. Cambrian anemones with preserved soft  
456 tissue from the Chengjiang biota, China. *Lethaia* **38**:193–203.  
457 doi: 10.1080/00241160510013295.
- 458 **Hu S**. 2005. *Taphonomy and palaeoecology of the early Cambrian Chengjiang biota from*  
459 *Eastern Yunnan, China*. Freie Universität Berlin, Berlin.
- 460 **Hyman LH**. 1940. *The Invertebrates: Protozoa through Ctenophora*. McGraw-Hill, New York.
- 461 **Jarms G**. 1991. Taxonomic characters from the polyp tubes of coronate medusae  
462 (Scyphozoa, Coronatae). *Hydrobiologia* **216/217**:463–470. doi: 10.1007/BF00026500.
- 463 **Kayal E**, Bentlage B, Sabrina Pankey M, Ohdera AH, Medina M, Plachetzki DC, Collins AG,  
464 Ryan JF. 2018. Phylogenomics provides a robust topology of the major cnidarian lineages  
465 and insights on the origins of key organismal traits. *BMC Evolutionary Biology* **18**:68.  
466 doi: 10.1186/s12862-018-1142-0.
- 467 **Lewis PO**. 2001. A likelihood approach to estimating phylogeny from discrete morphological  
468 character data. *Systematic Biology* **50**:913–925. doi: 10.1080/106351501753462876.
- 469 **Liu AG**, Matthews JJ, Menon LR, McIlroy D, Brasier MD. 2014. *Hootia quadriformis* n. gen.,  
470 n. sp., interpreted as a muscular cnidarian impression from the Late Ediacaran period  
471 (approx. 560 Ma). *Proceedings of the Royal Society B: Biological Sciences* **281**:20141202.  
472 doi: 10.1098/rspb.2014.1202.
- 473 **Luo H**, Hu S, Chen L, Zhang S, Tao Y. 1999. *Early Cambrian Chengjiang fauna from*  
474 *Kunming region, China*. Yunnan Science and Technology Press, Kunming.

- 475 **Malakhov VV**. 2016. Symmetry and the tentacular apparatus in Cnidaria. *Russian Journal of*  
476 *Marine Biology* **42**:287–298. doi: 10.1134/S1063074016040064.
- 477 **Marques AC**, Collins AG. 2004. Cladistic analysis of Medusozoa and cnidarian evolution.  
478 *Invertebrate Biology* **123**:23–42. doi: 10.1111/j.1744-7410.2004.tb00139.x.
- 479 **McFadden CS**, Quattrini AM, Brugler MR, Cowman PF, Dueñas LF, Kitahara MV, Paz-García  
480 DA, Reimer JD, Rodríguez E. 2021. Phylogenomics, Origin, and Diversification of  
481 Anthozoans (Phylum Cnidaria). *Systematic Biology* **70**:635–647.  
482 doi: 10.1093/sysbio/syaa103.
- 483 **Mendoza-Becerril MA**, Maronna MM, Pacheco MLAF, Simões MG, Leme JM, Miranda LS,  
484 Morandini AC, Marques AC. 2016. An evolutionary comparative analysis of the  
485 medusozoan (Cnidaria) exoskeleton. *Zoological Journal of the Linnean Society* **178**:206–  
486 225. doi: 10.1111/ZOJ.12415.
- 487 **Park E**, Hwang D-S, Lee J-S, Song J-I, Seo T-K, Won Y-J. 2012. Estimation of divergence  
488 times in cnidarian evolution based on mitochondrial protein-coding genes and the fossil  
489 record. *Molecular Phylogenetics and Evolution* **62**:329–345.  
490 doi: 10.1016/j.ympev.2011.10.008.
- 491 **Ronquist F**, Teslenko M, van der Mark P, Ayres DL, Darling A, Höhna S, Larget B, Liu L,  
492 Suchard MA, Huelsenbeck JP. 2012. MrBayes 3.2: efficient Bayesian phylogenetic  
493 inference and model choice across a large model space. *Systematic Biology* **61**:539–542.  
494 doi: 10.1093/sysbio/sys029.
- 495 **Ruppert EE**, Fox RS, Barnes RD. 2004. *Invertebrate zoology: A functional evolutionary*  
496 *approach, 7th edn*. Thomson-Brooks/Cole, Belmont, CA.
- 497 **Sanamyan NP**, Sanamyan KE, Grebelnyi SD. 2016. Two poorly known Arctic sea anemones,  
498 *Cactosoma abyssorum* and *Halcampa arctica* (Actiniaria: Halcampidae). *Invertebrate*  
499 *Zoology* **13**:1–14. doi: 10.15298/invertzool.13.1.01.
- 500 **Schuchert P**. 1993. Phylogenetic analysis of the Cnidaria. *Journal of Zoological Systematics*  
501 *and Evolutionary Research* **31**:161–173. doi: 10.1111/j.1439-0469.1993.tb00187.x.
- 502 **Scrutton CT**. 1998. The Palaeozoic corals, II: structure, variation and palaeoecology.  
503 *Proceedings of the Yorkshire Geological Society* **52**:1–57. doi: 10.1144/pygs.52.1.1.
- 504 **Stampar SN**, Beneti JS, Acuña FH, Morandini AC. 2015. Ultrastructure and tube formation in  
505 Ceriantharia (Cnidaria, Anthozoa). *Zoologischer Anzeiger* **254**:67–71.  
506 doi: 10.1016/j.jcz.2014.11.004.
- 507 **Steiner M**, Qian Y, Li G, Hagadorn JW, Zhu M. 2014. The developmental cycles of early  
508 Cambrian Olivoidae fam. nov. (?Cycloneuralia) from the Yangtze Platform (China).  
509 *Palaeogeography, Palaeoclimatology, Palaeoecology* **398**:97–124.  
510 doi: 10.1016/j.palaeo.2013.08.016.
- 511 **Technau U**, Steele RE. 2011. Evolutionary crossroads in developmental biology: Cnidaria.  
512 *Development* **138**:1447–1458. doi: 10.1242/dev.048959.
- 513 **Van Iten H**, Leme JM, Pacheco MLAF, Simões MG, Fairchild TR, Rodrigues F, Galante D,  
514 Boggiani PC, Marques AC. 2016. Origin and early diversification of Phylum Cnidaria: key

- 515 macrofossils from the Ediacaran system of North and South America. In: Goffredo S,  
516 Dubinsky Z, eds. *The Cnidaria, Past, Present and Future: the world of Medusa and her*  
517 *sisters*. Springer, Cham.
- 518 **Van Iten H**, Marques AC, Leme JdM, Pacheco MLAF, Simões MG. 2014. Origin and early  
519 diversification of the phylum Cnidaria Verrill: major developments in the analysis of the  
520 taxon's Proterozoic-Cambrian history. *Palaeontology* **57**:677–690. doi: 10.1111/pala.12116.
- 521 **Van Iten H**, Moraes Leme J de, Simões MG, Marques AC, Collins AG. 2006. Reassessment  
522 of the phylogenetic position of conulariids (?Ediacaran-Triassic) within the subphylum  
523 medusozoa (phylum cnidaria). *Journal of Systematic Palaeontology* **4**:109–118.  
524 doi: 10.1017/S1477201905001793.
- 525 **Van Iten H**, Tollerton VP, Ver Straeten CA, Moraes Leme J de, Simões MG, Rodrigues SC.  
526 2013. Life mode of *in situ* *Conularia* in a Middle Devonian epibole. *Palaeontology* **56**:29–  
527 48. doi: 10.1111/j.1475-4983.2012.01146.x.
- 528 **Walde DH-G**, Weber B, Erdtmann B-D, Steiner M. 2019. Taphonomy of *Corumbella weneri*  
529 from the Ediacaran of Brazil: sinotubulitid tube or conulariid test? *Alcheringa* **43**:335–350.  
530 doi: 10.1080/03115518.2019.1615551.
- 531 **Zhang Z**, Holmer LE, Skovsted CB, Brock GA, Budd GE, Fu D, Zhang X, Shu D, Han J, Liu J,  
532 Wang H, Butler A, Li G. 2013. A sclerite-bearing stem group entoproct from the early  
533 Cambrian and its implications. *Scientific Reports* **3**:1066. doi: 10.1038/srep01066.
- 534 **Zhao Y**, Vinther J, Parry LA, Wei F, Green E, Pisani D, Hou X, Edgecombe GD, Cong P.  
535 2019. Cambrian sessile, suspension feeding stem-group ctenophores and evolution of the  
536 comb jelly body plan. *Current Biology* **29**:1112-1125. e2. doi: 10.1016/j.cub.2019.02.036.
- 537 **Zhu M-Y**, Van Iten H, Cox RS, Zhao Y-L, Erdtmann B-D. 2000. Occurrence of *Byronia*  
538 *Matthew* and *Sphenothallus* Hall in the Lower Cambrian of China. *Paläontologische*  
539 *Zeitschrift* **74**:227–238. doi: 10.1007/BF02988098.
- 540



541

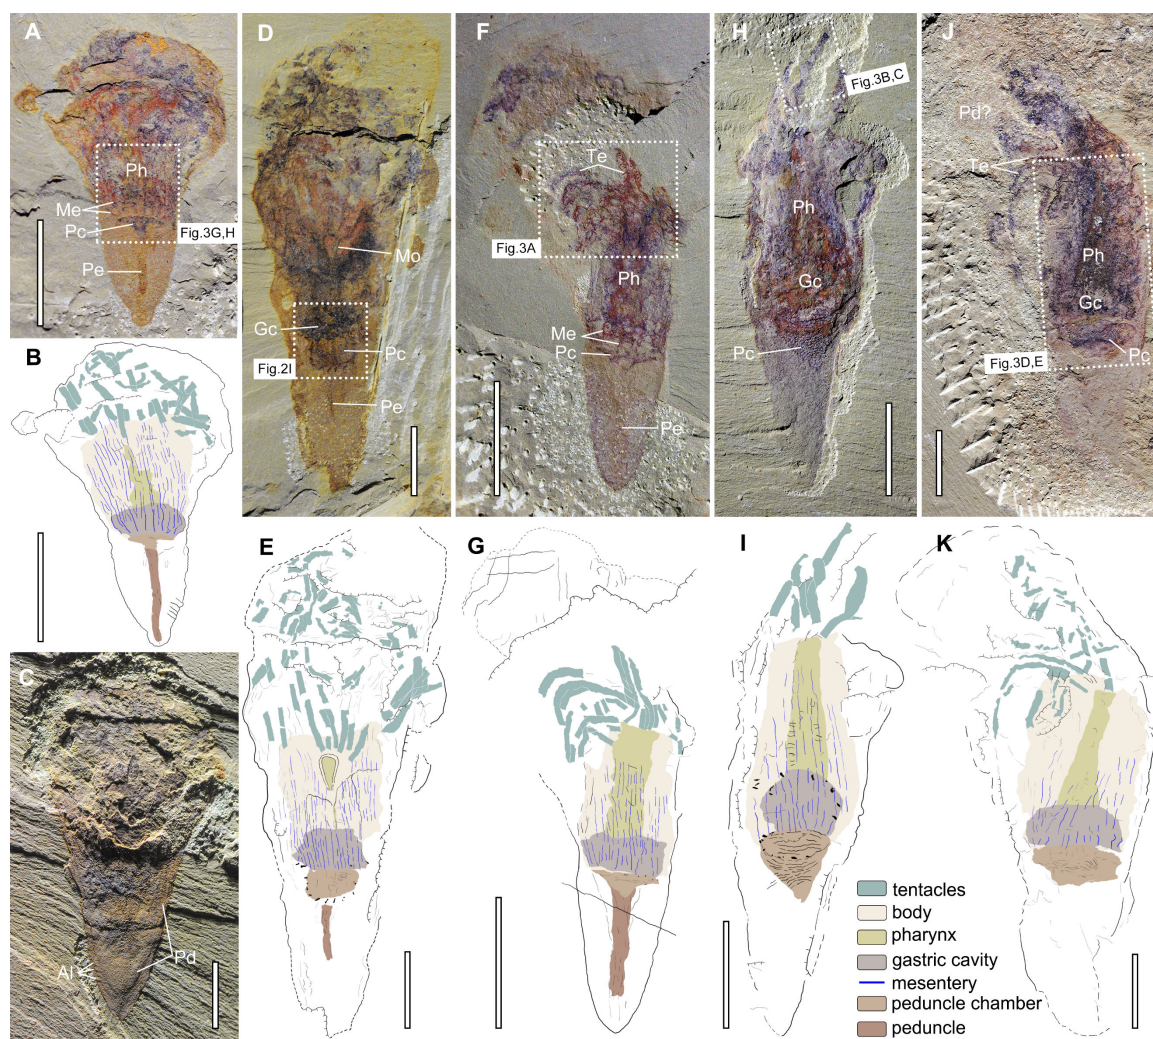

542

543 **Figure 1. General morphology of *C. striata*.** (A-B) YKLP 13212a. (C) YKLP 13213a. (D-E)

544 YKLP 13215a. (F-G) YKLP 13288a. (H-I) YKLP 13484a. (J-K) YKLP 13485a. Al, annulation;

545 Gc, gastric cavity; Me, mesentery; Mo, mouth; Pc, peduncle chamber; Pd, periderm; Pe,

546 peduncle; Ph, pharynx; Te, tentacle. Scale bars: 5 mm (A-K). See also Figures S1-S7.

547

548



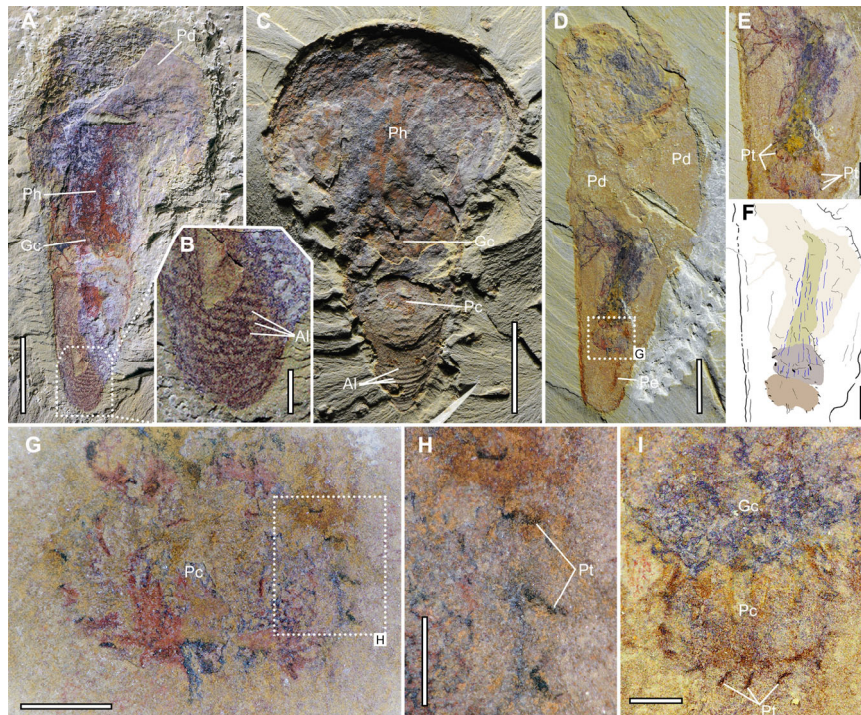

549

550 **Figure 2. Exoskeleton/periderm of *C. striata*.** (A) YKLP 13488, complete specimen showing  
551 smooth periderm in the broken globular region. (B) Magnification of the apical portion of the  
552 skeleton, showing parallel annulations. (C) YKLP 13214b, under low angle light, showing slight  
553 relief of annulations in the proximal portion. (D-H) YKLP 13210a, showing polyp soft tissues  
554 within the periderm. (E-F) Close-up of the soft parts of the polyp and interpretative drawing  
555 (colour scheme as in Figure 1). (G-H) Close-up of the peduncle chamber, encircled by dark,  
556 spine-like peridermal teeth. (I) YKLP 13215a, showing the gastric cavity and peridermal teeth.  
557 Al, annulation; Gc, gastric cavity; Pc, peduncle chamber; Pd, periderm; Pe, peduncle; Ph,  
558 pharynx; Pt, peridermal teeth. Scale bars: 500  $\mu$ m (H); 1 mm (B, G, I); 2 mm (E, F); 5 mm (A,  
559 C, D). See also Figure S2.

560



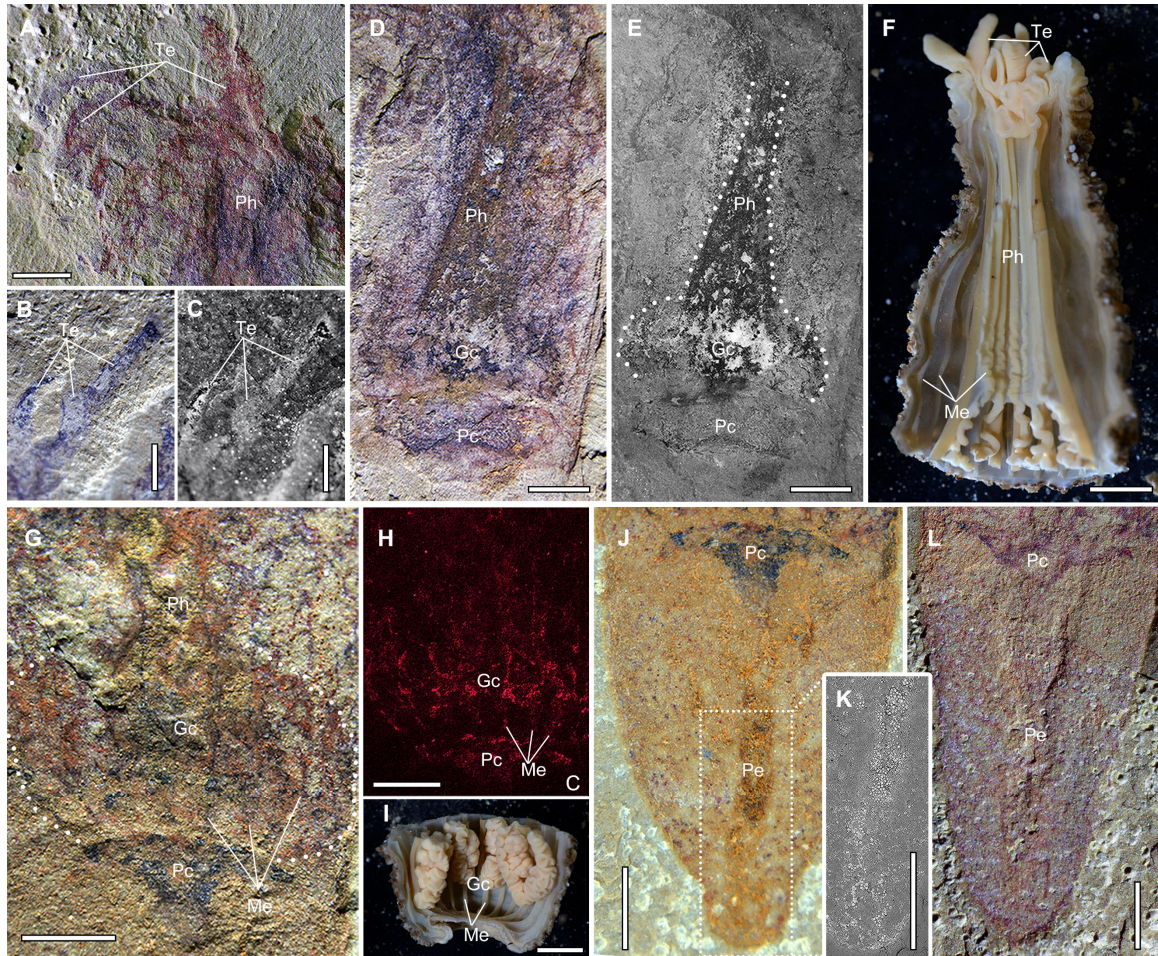

561

562 **Figure 3. Internal anatomy of *C. striata*.** (A) YKLP 13288a, showing circumoral tentacles. (B-  
563 C) YKLP 13484a, close-up of tentacles, showing flexible, unbranched features, in direct light  
564 (B) and fluorescent light (C). (D-E) YKLP 13485a, details of internal structures, showing a  
565 tubular pharynx, gastric cavity and peduncle chamber. (F) Extant sea anemone *Cactosoma*  
566 *abyssorum* (Sanamyan et al., 2016), longitudinal section of the distal half of the body, showing  
567 circumoral tentacles, an actinopharynx and mesenteries. (G-H) YKLP 13212a, details of the  
568 gastric cavity partitioned by longitudinal, dark lines (mesenteries), imaged in direct light (G) and  
569 elemental map of carbon (H). (I) Living sea anemone *Cactosoma abyssorum* (Sanamyan et al.,  
570 2016), longitudinal section of the proximal part of the body, showing a gastric cavity partitioned  
571 by more than eight mesenteries. (J) YKLP 13212a, close-up of the lower conical portion,  
572 showing a tube-like peduncle extended from the dark peduncle chamber. (K) Magnification of  
573 the peduncle using backscatter SEM, showing abundant weathered pyrite granules gathered  
574 in the peduncle. (L) YKLP 13288a, close-up of the lower conical portion, showing slight relief of  
575 the peduncle. Gc, gastric cavity; Me, mesentery; Pc, peduncle chamber; Pe, peduncle; Ph,  
576 pharynx; Te, tentacle. Scale bars: 1 mm (A-C, G, H, J-L); 2 mm (D-F, I). See also Figures S4  
577 and S5.

578

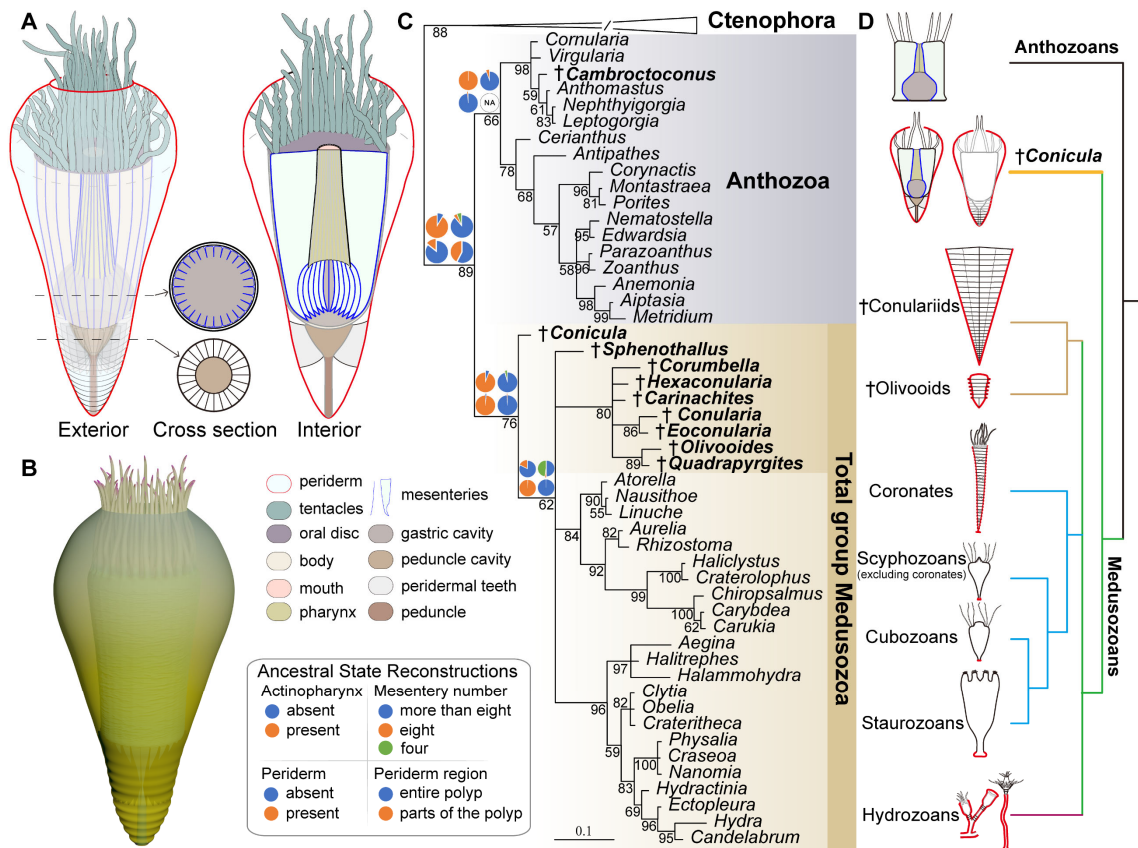

579

580 **Figure 4. Reconstruction and phylogenetic analysis.** (A) Technical reconstruction showing  
 581 the exterior gross morphology, interior anatomy and cross section of gastric cavity and  
 582 peduncle chamber. The colour scheme is described to the top right of (B). (B) Three-  
 583 dimensional model of *C. striata*. (C) Bayesian phylogenetic analysis (304 characters, 99 taxa,  
 584 mkv+gamma model), *C. striata* is resolved as a stem group medusozoan. The fossil taxa are  
 585 indicated by dagger symbol. Pie charts illustrate ancestral states from Bayesian analysis.  
 586 Numbers at the nodes are posterior probabilities, and the scale bar is the expected number of  
 587 substitutions per site. (D) Simplified cladogram of cnidarians, showing that *C. striata* has mosaic  
 588 characters of anthozoan (a high number of mesenteries and a tubular pharynx) and  
 589 medusozoan (an annulated periderm and teeth) polyps. See also Figure S8 for full results and  
 590 additional information.

591

Supplementary Information for

## **An early Cambrian polyp reveals an anemone-like ancestor for medusozoan cnidarians**

Yang Zhao, Luke A. Parry, Jakob Vinther, Frances S. Dunn, Yu-jing Li, Fan Wei,  
Xian-guang Hou & Pei-yun Cong

Corresponding authors: Luke A. Parry, Pei-yun Cong

Email: [luke.parry@seh.ox.ac.uk](mailto:luke.parry@seh.ox.ac.uk), [cong@ynu.edu.cn](mailto:cong@ynu.edu.cn)

**This PDF file includes:**

Figures S1 to S8

Tables S1

Phylogenetic information

SI References

**Other supplementary materials for this manuscript include the following:**

Datasets S1 *Conicula* phylogenetic code



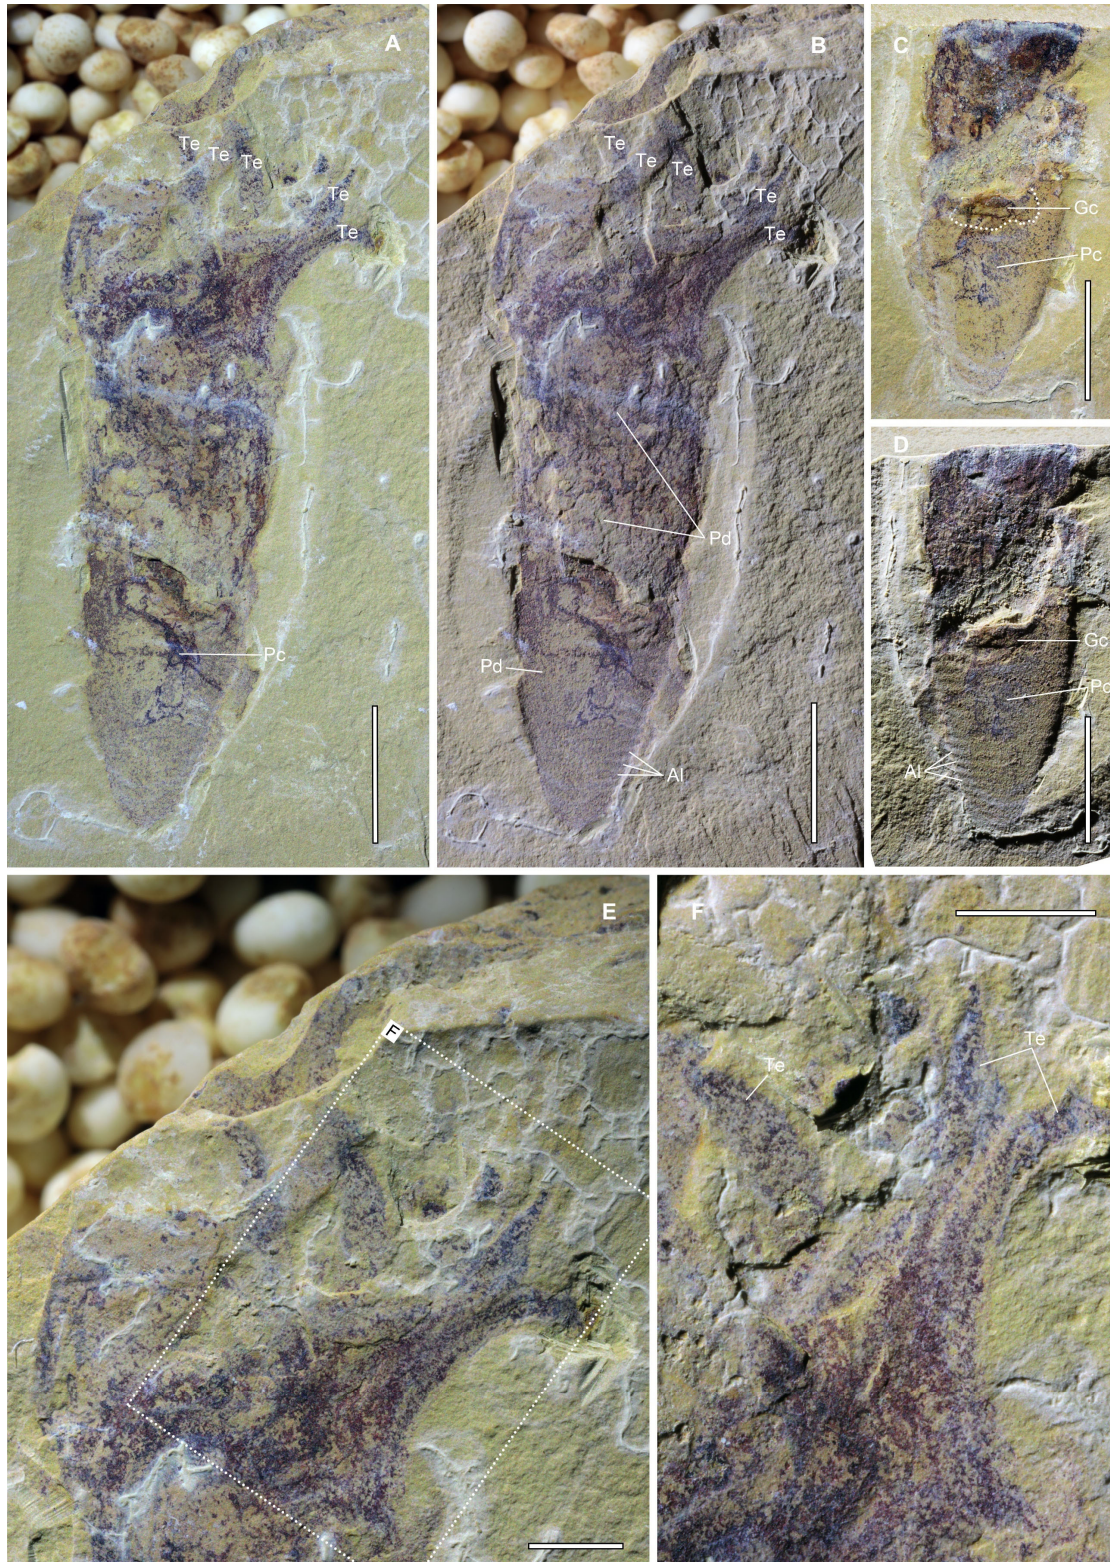

**Fig. S1. The holotype of *C. striata*.** (A-B) The part of holotype, He-f-6-5-112. (C-D) The counterpart of holotype, He-f-6-5-113. Imaged under high angle (A, C) and low angle (B, D) direct light. (E) Magnification of the distal region, showing scattered tentacles. (F) Details of the unbranched tentacles. Al, annulation; Gc, gastric cavity; Pc, peduncle chamber; Pd, periderm; Te, tentacle. Scale bars: 2 mm (E and F); 5 mm (A-D).



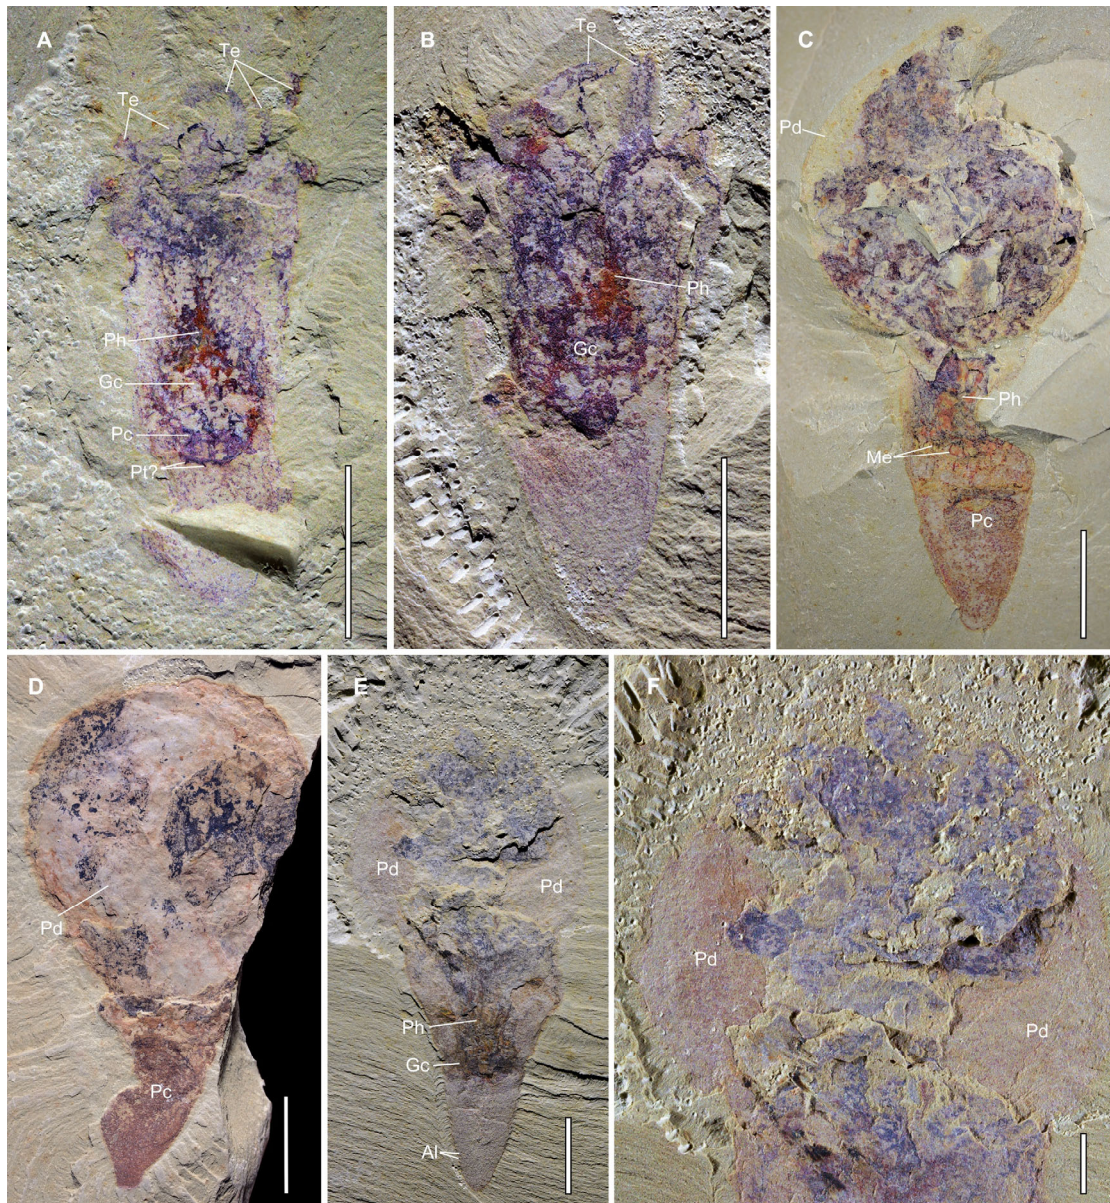

**Fig. S2. Additional specimens of *C. striata*.** (A) YKLP 13486. (B) YKLP 13290. (C) YKLP 13486. (D) YKLP 13490. (E) YKLP 13220; (F) Close-up of the globular region in E, the external periderm is exposed due to its broken preservation. Al, annulation; Gc, gastric cavity; Me, mesentery; Pc, peduncle chamber; Pd, periderm; Ph, pharynx; Pt, peridermal teeth; Te, tentacle. Scale bars: 2 mm (F); 5 mm (A-E).



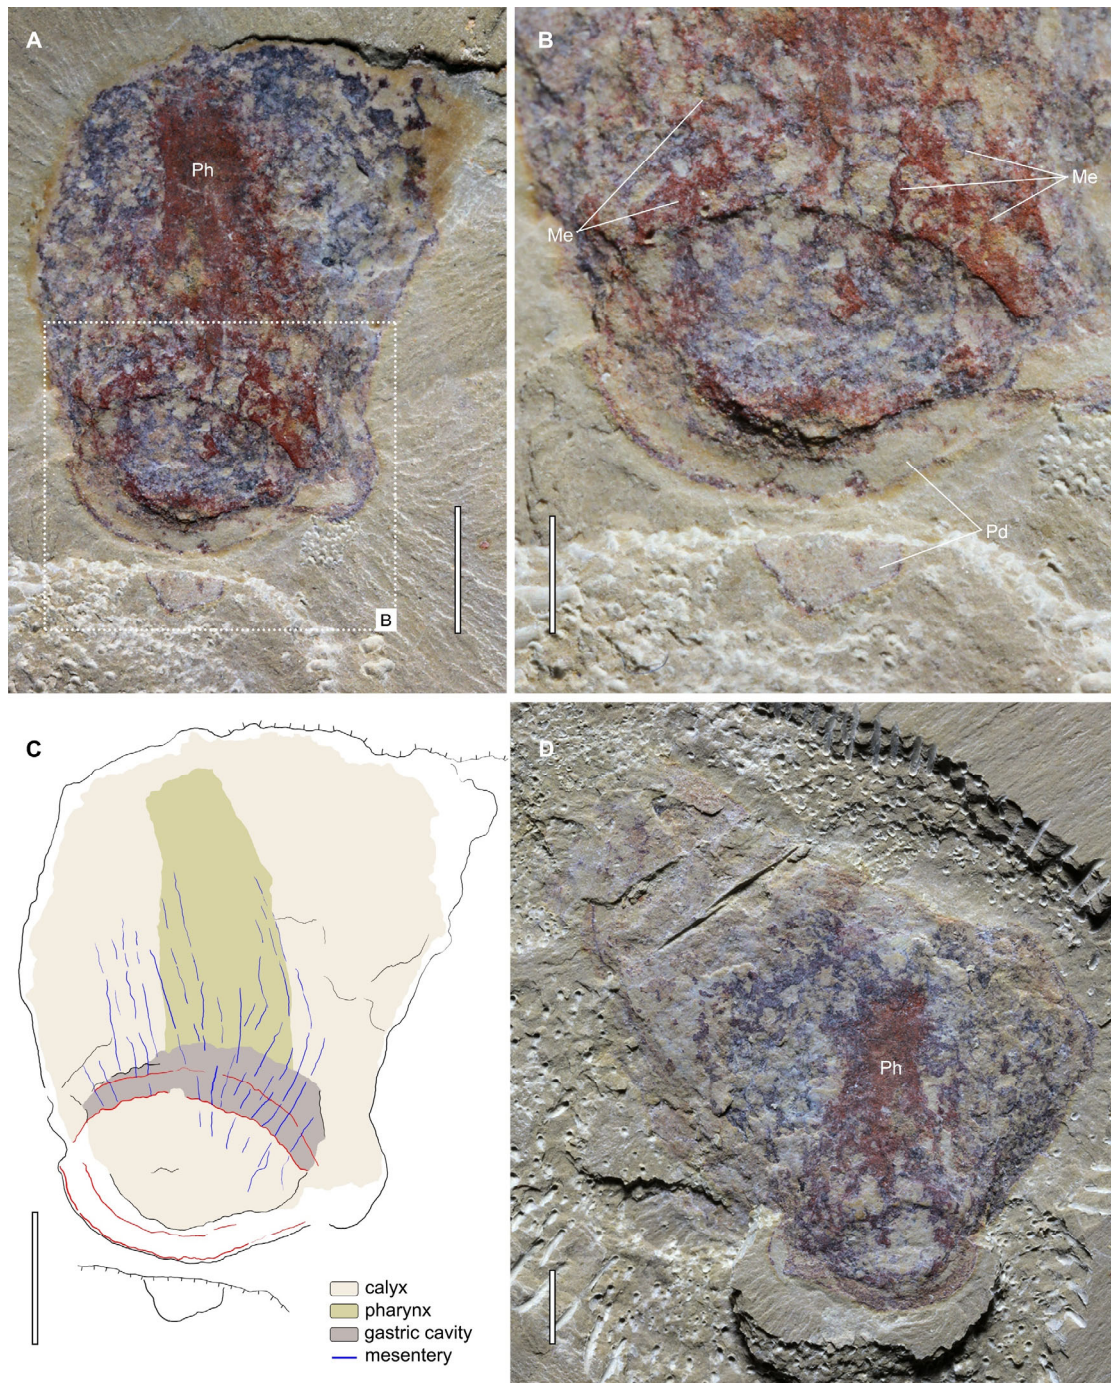

**Fig. S3. Additional specimen of *C. striata*, preserved in oblique-lateral view. (A-C)** YKLP 13492a, (A) an overview of the part, (B) magnification of the body portion, showing a circle-shaped cross section, (C) interpretative drawing of A, red lines draw the outline of the cross section. (D) YKLP 13492b, an overview of the counterpart. Me, mesentery; Pd, periderm; Ph, pharynx. Scale bars: 1 mm (B); 2 mm (A, C, D).



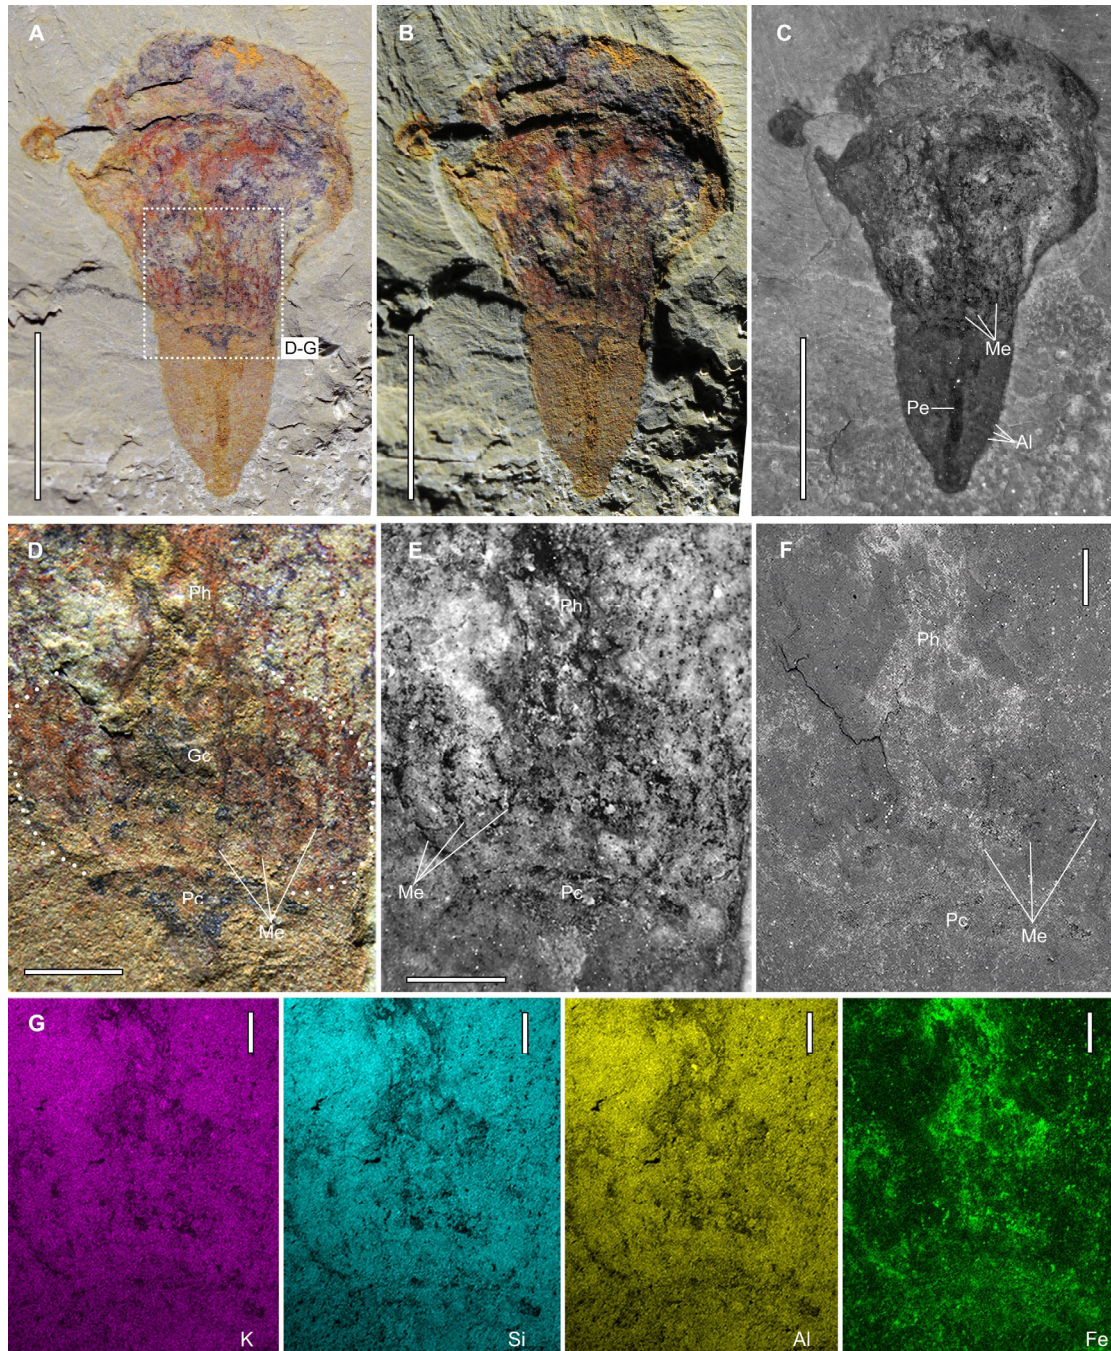

**Fig. S4. Additional details of *C. striata*, YKLP 13212a (related to Fig. 1A).** (A-C) An overview of the part, in high angle light (A), low angle light (B) and fluorescent light (C), respectively. (D-F) Close-up of the cavity region, showing a peduncle chamber, a pharynx and a gastric cavity partitioned by dark lines (mesenteries), in direct light (D), fluorescent light (E) and backscatter of SEM (F), respectively. (G) Elemental maps of the same region as in F, showing high content of iron in the pharynx. Al, annulation; Gc, gastric cavity; Me, mesentery; Pc, peduncle chamber; Pe, peduncle; Ph, pharynx. Scale bars: 500 μm (F and G); 1 mm (D and E); 5 mm (A-C).



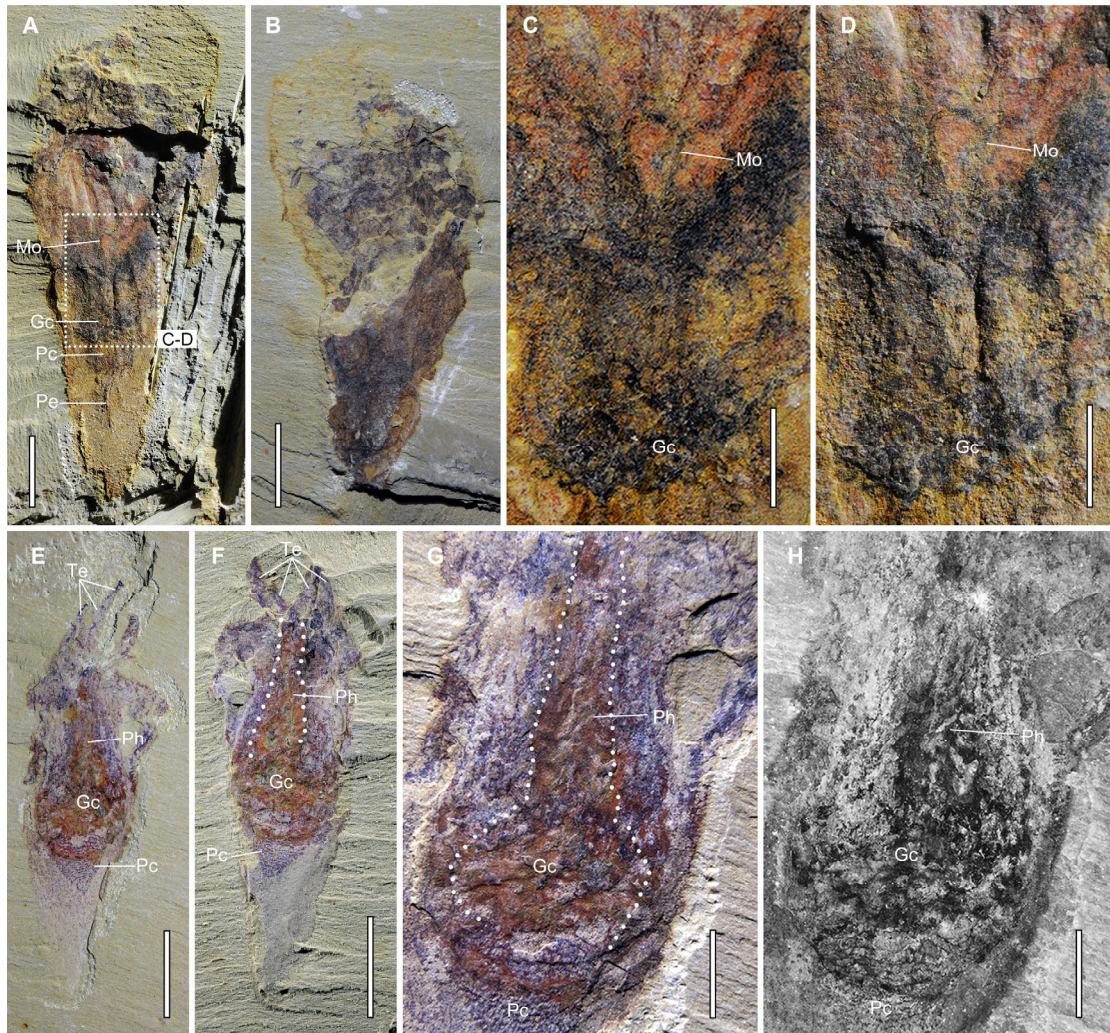

**Fig. S5. Additional details of *C. striata* (related to Fig. 1D, H).** (A) YKLP 13215a, an overview of the part. (B) YKLP 13215b, an overview of the counterpart, showing a globular structure at the distal region. (C-D) Close-up of the pharynx region in A, showing a tongue-shaped dark structure, possible a mouth of the polyp, imaged under high angle light (C) and low angle light (D), respectively. (E) YKLP 13484a, an overview of the part. (F) YKLP 13484b, an overview of the counterpart. (G-H) Close-up of the digestive tract in E, showing a longitudinal pharynx and an expanded gastric cavity, in direct light (G) and fluorescent light (H), respectively. Gc, gastric cavity; Mo, mouth; Pc, peduncle chamber; Pe, peduncle; Ph, pharynx; Te, tentacle. Scale bars: 2 mm (C, D, G, H); 5 mm (A, B, E, F).



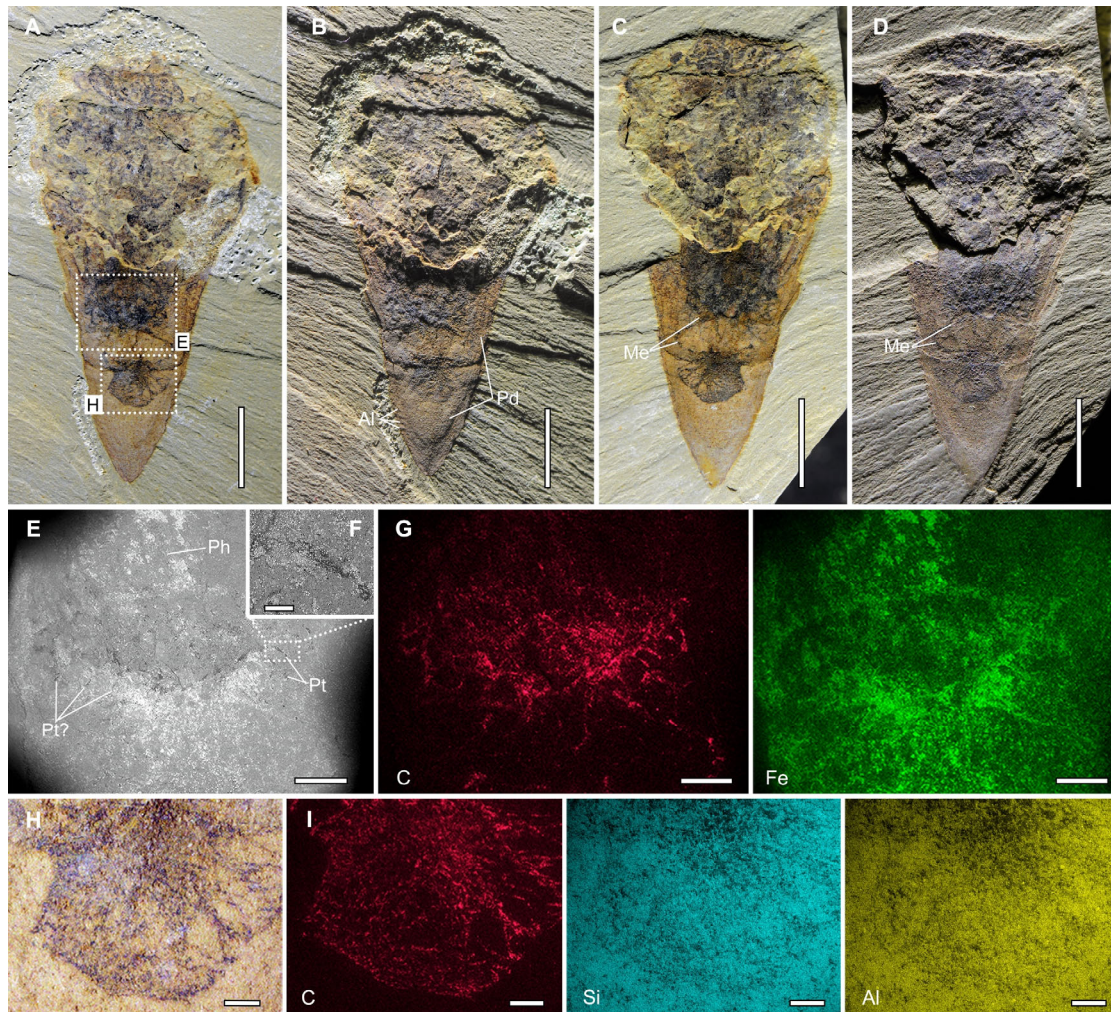

**Fig. S6. Additional details of *C. striata*, YKLP 13213 (related to Fig. 1C).** (A-B) YKLP 13213a, an overview of the part, under high angle light (A) and low angle light (B), respectively. (C-D) YKLP 13213b, an overview of the counterpart, under high angle light (C) and low angle light (D). (E) SEM backscatter of the cavity region, possibly surrounding with peridermal teeth. (F) Close-up of a peridermal tooth. (G) Elemental maps of the same region as in E. (H) Close-up of the peduncle chamber. (I) Elemental maps of the same region of H, showing high content of carbon in the peduncle chamber. Al, annulation; Me, mesentery; Pd, periderm; Ph, pharynx; Pt, peridermal teeth. Scale bars: 100 μm (F); 500 μm (H and I); 1 mm (E and G); 5 mm (A-D).



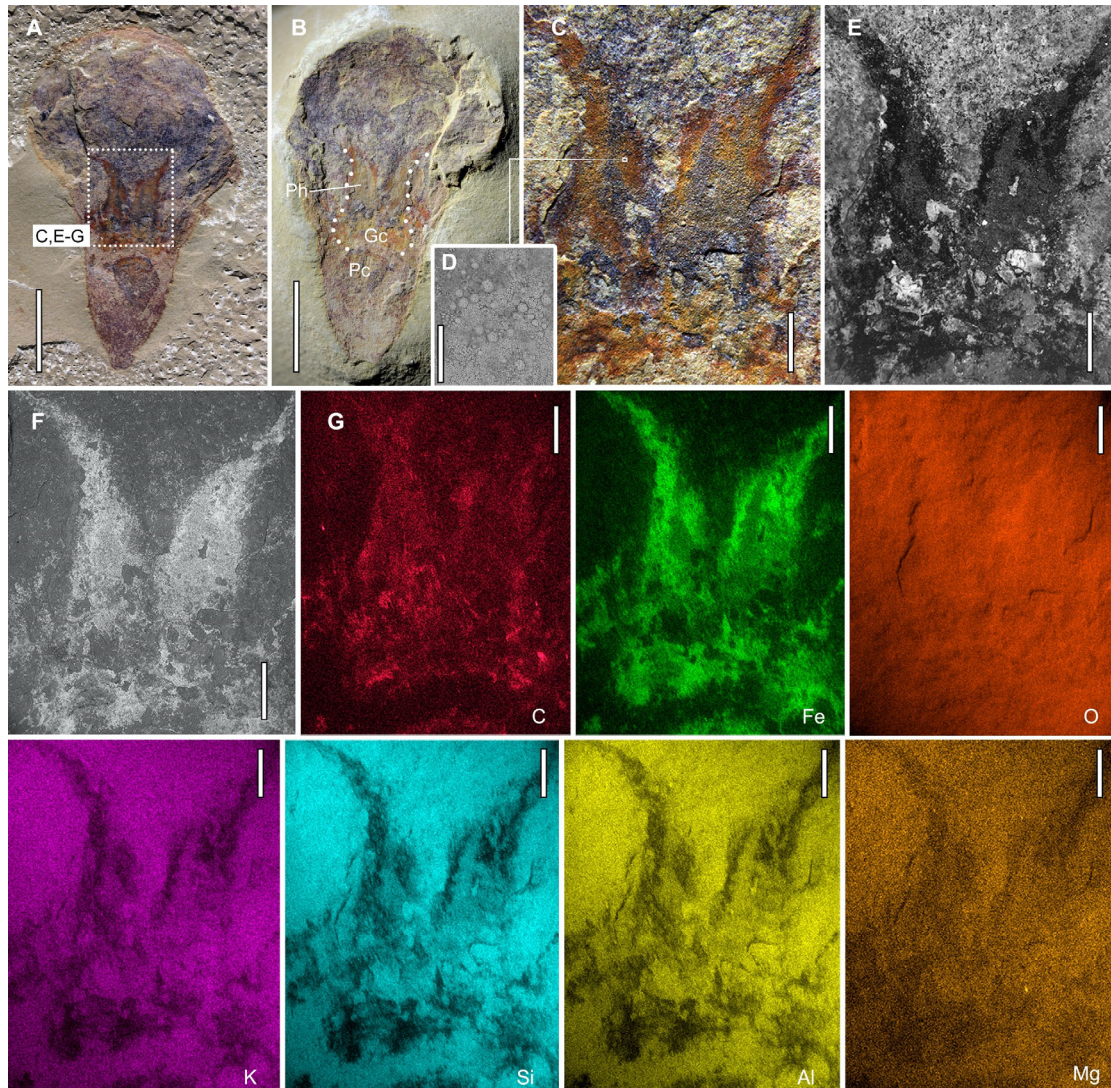

**Fig. S7. Additional details of *C. striata*, YKLP 13493.** (A) YKLP 13493a, an overview of the part. (B) YKLP 13493b, an overview of the counterpart, showing a pharynx, a gastric cavity and a peduncle chamber. (C) Close-up of the pharynx region in A. (D) SEM backscatter of the pharynx in C, showing abundant weathered pyrite granules gathered in the pharynx. (E-F) The same view as in C, under fluorescent light (E) and backscatter of SEM (F), respectively. (G) Elemental maps of the same view as in F, showing high content of carbon and iron in the pharynx. Gc, gastric cavity; Pc, peduncle chamber; Ph, pharynx. Scale bars: 50  $\mu\text{m}$  (D); 1 mm (C, E-G); 5 mm (A and B).

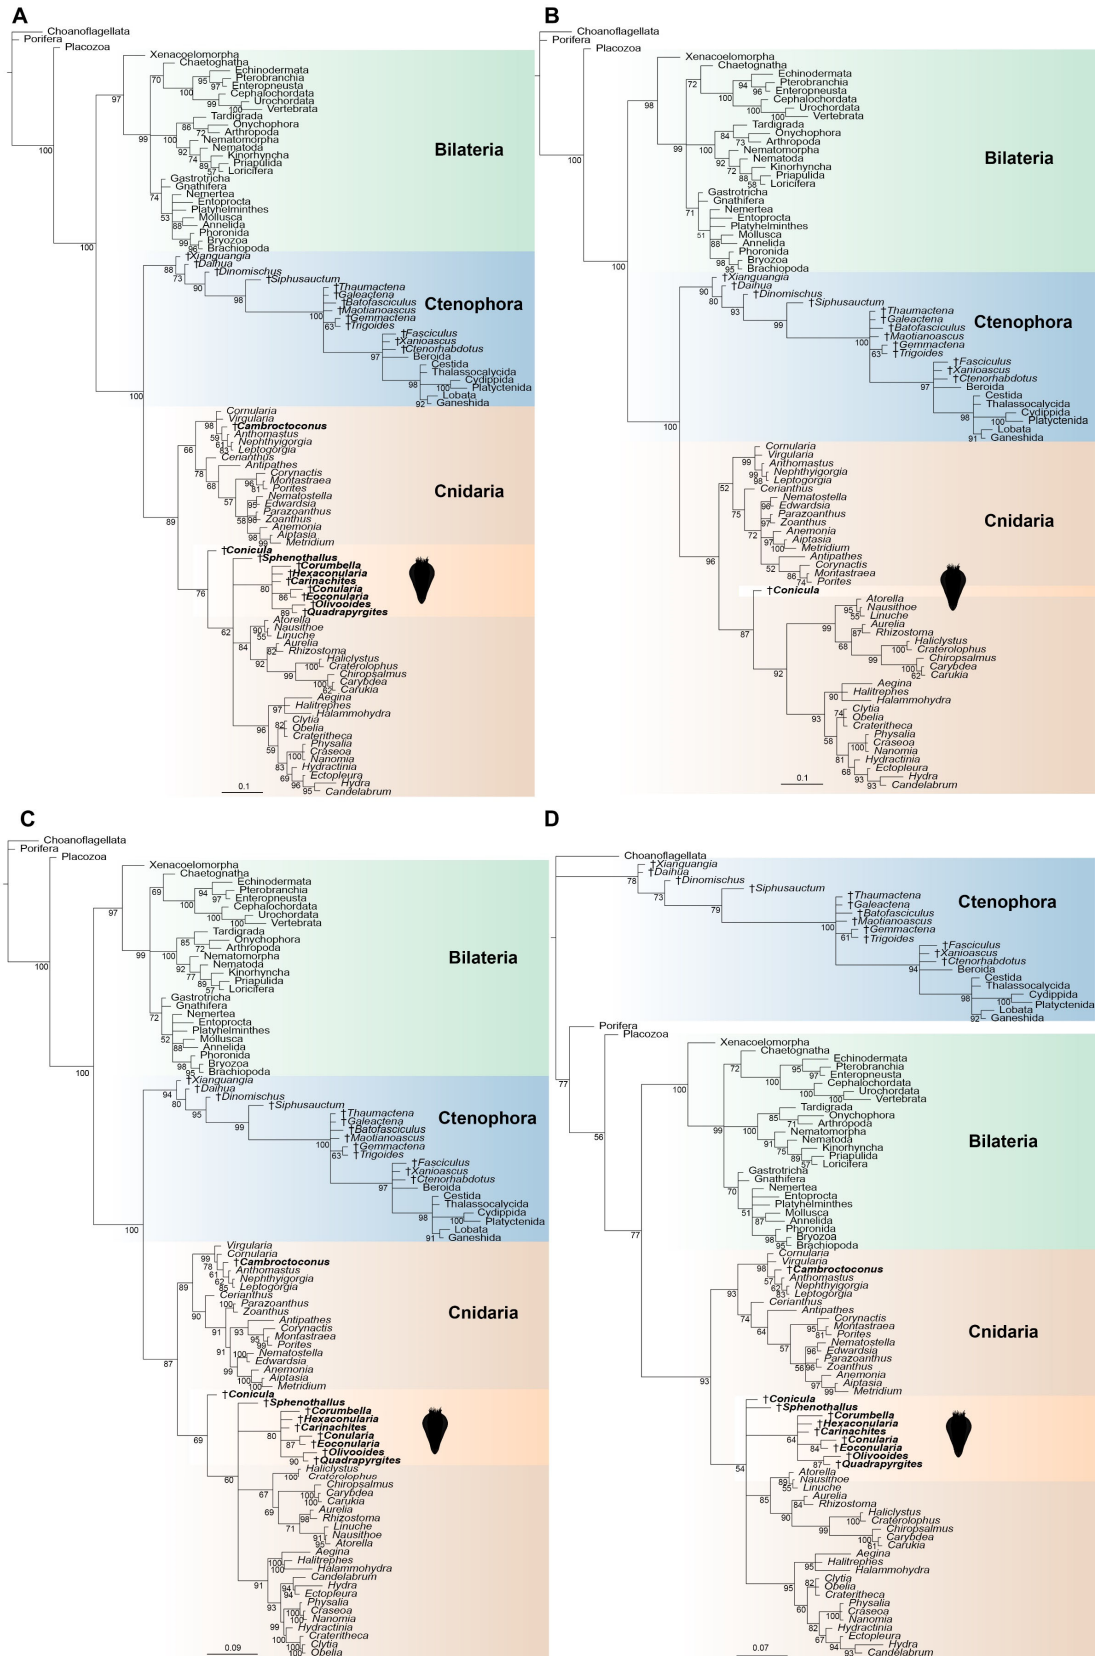

**Fig. S8. Additional results of phylogenetic analyses (related to Fig. 4C, D).** (A) The full results of Fig. 4C, with all the sampled taxa under the condition of unconstraint. (B)



The newly added tubular fossils and *Cambroctoconus* are removed, and the topology is unconstrained. *C. striata* is also recovered as a stem group medusozoan. (C) The in-group relationships of cnidarians are constrained based on recent phylogenomic results. *C. striata* is still recovered as a stem group medusozoan. (D) Ctenophores are constrained as the sister group of all other metazoans (ctenophore-first) and cnidarians are constrained as the sister group of bilaterians. *C. striata* is recovered as a total group medusozoan, and is resolved in a clade that is in a polytomy with extant medusozoan taxa and tubular fossils. Numbers at nodes refer to posterior probabilities and scale bars are in units of expected number of substitutions per site. The fossil taxa are indicated by dagger symbol.

**Table S1. The main occurrence of potential cnidarian fossils in Ediacaran-Cambrian period**

| Occurrence                                                                                                                                                                                               | Taxa                                                                                                                                                                                                     | Type                                       | Affinity                                                           | Key references                                                                                                                                             |
|----------------------------------------------------------------------------------------------------------------------------------------------------------------------------------------------------------|----------------------------------------------------------------------------------------------------------------------------------------------------------------------------------------------------------|--------------------------------------------|--------------------------------------------------------------------|------------------------------------------------------------------------------------------------------------------------------------------------------------|
| Cambrian Furongian (Fengshan Formation, North China)                                                                                                                                                     | <i>Palaeodiphasia simplex</i> Lin, 1985                                                                                                                                                                  | Macrofossil (exoskeleton-bearing)          | Hydroidolina; Graptolite                                           | <b><i>Song et al., 2021</i></b>                                                                                                                            |
| Cambrian – Triassic (Furongian, St. Lawrence Formation, USA)                                                                                                                                             | Conulariida Miller et Gurley, 1896 (Conulariidae Walcott, 1886; Genera <i>e.g. Baccaconularia</i> Hughes et al., 2000)                                                                                   | Macrofossil (exoskeleton-bearing)          | Cnidarians (scyphozoans)                                           | <b><i>Hughes et al., 2000; Leme et al., 2008a; Leme et al., 2008b; Van Iten et al., 2006</i></b>                                                           |
| Cambrian Miaolingian (Marjum Formation of Utah)                                                                                                                                                          | 4 unnamed species                                                                                                                                                                                        | Exceptionally preserved macrofossils       | Medusozoans                                                        | <b><i>Cartwright et al., 2007</i></b>                                                                                                                      |
| Cambrian - Ordovician ( <i>e.g.</i> Cambrian: Series 2, Kaili Formation, Tsinghsudung Formation; Miaolingian, Burgess Shale)                                                                             | <i>Byronia</i> Matthew, 1899 ( <i>e.g. B. annulata</i> Matthew, 1899; <i>B. natus</i> Liu, 1986)                                                                                                         |                                            | Cnidarians?                                                        | <b><i>Bischoff, 1989; Chang et al., 2018; Zhu et al., 2000</i></b>                                                                                         |
| Cambrian Series 2 - Carboniferous Pennsylvanian (Widespread. Cambrian: Series 2, <i>e.g.</i> Niutitang Formation, Shuijingtuo Formation, Xiannudong Formation, Kaili Formation; Miaolingian, <i>e.g.</i> | <i>Sphenothallus</i> Hall, 1847 ( <i>e.g. S. taijiangensis</i> Zhu et al., 2000; <i>S. songlinensis</i> Peng et al., 2005; <i>S. kozaki</i> Fatka et al., 2012; ? <i>S. kordulei</i> Fatka et al., 2012) | Tubular macrofossils (exoskeleton-bearing) | Cnidarians?; Tubicolous annelids or other “worm”; Conulariids-like | <b><i>Chang et al., 2018; Fatka et al., 2012; Li et al., 2004; Muscente and Xiao, 2015; Peng et al., 2005; Van Iten et al., 2002; Zhu et al., 2000</i></b> |

| Occurrence                                                                                                                                                                                                            | Taxa                                                                                                                                                                                                                           | Type                                                     | Affinity                                  | Key references                                                                                       |
|-----------------------------------------------------------------------------------------------------------------------------------------------------------------------------------------------------------------------|--------------------------------------------------------------------------------------------------------------------------------------------------------------------------------------------------------------------------------|----------------------------------------------------------|-------------------------------------------|------------------------------------------------------------------------------------------------------|
| Burgess Shale)                                                                                                                                                                                                        |                                                                                                                                                                                                                                |                                                          |                                           |                                                                                                      |
| Cambrian Series 2 -<br>Miaolingian (Stage 4, Henson<br>Gletscher Formation; Wuliuan,<br>upper Henson Gletscher<br>Formation, Greenland; Drumian<br>Changhia Formation, North<br>China, Daegi Formation, Korea)        | <i>Cambroctoconus</i> Park et al., 2011 ( <i>C. orientalis</i> Park et al., 2011; <i>C. kyrgyzstanicus</i> Peel in Geyer et al., 2014; <i>C. coreaensis</i> Park et al. 2016; <i>C. koori</i> Peel, 2017)                      | Calcareous<br>skeleton fossils                           | Stem-group<br>cnidarian;<br>Octocorallian | <b>Geyer et al., 2014; Park et al., 2011; Park et al., 2016; Peel, 2017</b>                          |
| Cambrian Series 2 -<br>Miaolingian (Stage 4, Shipai<br>Formation; Wuliuan, Burgess<br>Shale)                                                                                                                          | <i>Mackenzia costalis</i> Walcott, 1911                                                                                                                                                                                        | Exceptionally<br>preserved<br>macrofossils               | Holothuroidea;<br>Actiniarians            | <b>Chang et al., 2018;<br/>Conway Morris, 1993;<br/>Walcott, 1911</b>                                |
| Cambrian Miaolingian<br>(Wuliuan, Burgess Shale)                                                                                                                                                                      | <i>Thaumaptilon walcolli</i> Conway<br>Morris, 1993                                                                                                                                                                            |                                                          | Pennatulacea?                             | <b>Conway Morris, 1993</b>                                                                           |
| Cambrian Terrenewian -<br>Miaolingian (Stage 2, Yanjiahe<br>Formation; Stage 3, Shuijingtuo<br>Formation; Stage 4, Shipai<br>Formation; Wuliuan, Burgess<br>Shale, Wheeler Formation;<br>Guzhangian, Weeks Formation) | <i>Cambrorhytium</i> Conway Morris et<br>Robison, 1988 (amended)( <i>C. major</i><br>Walcott, 1908; <i>C. fragilis</i> Walcott,<br>1911; <i>C. minor</i> Ivantsov and Urbanek,<br>2005; <i>C. gracilis</i> Chang et al., 2018) | Conotubular<br>macrofossils<br>(exoskeleton-<br>bearing) | Cnidarians?                               | <b>Chang et al., 2018;<br/>Conway Morris and<br/>Robison, 1988; Lerosey-<br/>Aubril et al., 2018</b> |
| Cambrian Series 2 (Kaili<br>Formation)                                                                                                                                                                                | <i>Cambrovitus balangensis</i> Mao et al.,<br>1992                                                                                                                                                                             | Tubular<br>macrofossil<br>(exoskeleton-                  | Cnidarians?                               | <b>Zhu et al., 2000</b>                                                                              |

| Occurrence                                                             | Taxa                                                      | Type                                                       | Affinity                                                       | Key references                                                             |
|------------------------------------------------------------------------|-----------------------------------------------------------|------------------------------------------------------------|----------------------------------------------------------------|----------------------------------------------------------------------------|
| Cambrian Series 2 (Stage 3, Shuijingtou Formation, Qingjiang biota)    | 2 unnamed species                                         | Exceptionally preserved macrofossils (bearing)             | Polypoid/medusoid cnidarians                                   | <i>Fu et al., 2019</i>                                                     |
|                                                                        | <i>Cambrohydra ercaia</i> Hu, 2005                        |                                                            | Hydrozoan?                                                     | <i>Hu, 2005</i>                                                            |
|                                                                        | <i>Conicula striata</i> Luo et Hu, 1999                   | Exceptionally preserved macrofossils (exoskeleton-bearing) | Lophophorate; Actinarian; Phlogitid                            | <i>Caron et al., 2010; Hu, 2005; Luo et al., 1999</i><br><b>This study</b> |
|                                                                        | <i>Archotuba conoidalis</i> Hou et al., 1999              |                                                            | Cone-shaped cnidarian                                          | <i>Hou et al., 1999; Lei et al., 2014</i>                                  |
| Cambrian Series 2 (Stage 3, Chiung-chussu Formation, Chengjiang biota) | <i>Archisaccophyllia kunmingensis</i> Hou et al., 2005    |                                                            | Actinarian                                                     | <i>Hou et al., 2005; Lei et al., 2014</i>                                  |
|                                                                        | <i>Chengjiangopenna wangii</i> Shu et Conway Morris, 2006 | Exceptionally preserved macrofossils                       | Crown-group octocorallian; Junior synonyms of <i>X. sinica</i> | <i>Ou et al., 2017; 2006</i>                                               |
|                                                                        | <i>Priscopennamarina angusta</i> Zhang et Babcock, 2001   |                                                            | Pennatulacea?                                                  | <i>Zhang and Babcock, 2001</i>                                             |
|                                                                        | <i>Yunnanoascus haikouensis</i> Hu et al., 2007           |                                                            | Scyphozoan; Ctenophore                                         | <i>Han et al., 2016a; Hu et al., 2007</i>                                  |
| Cambrian Terreneuvian (Stage 2, Yanjiahe Formation, China)             | <i>Octapyrgites elongatus</i> Guo et al., 2019            |                                                            | Medusozoan? (Olivoodae)                                        | <i>Guo et al., 2020a</i>                                                   |
|                                                                        | Other Olivoodae(-like)                                    |                                                            | Cubozoans?                                                     | <i>Han et al., 2013; 2016b</i>                                             |

| Occurrence                                                                                                  | Taxa                                                                                                                                                                 | Type                                                        | Affinity                                                     | Key references                                                                                               |
|-------------------------------------------------------------------------------------------------------------|----------------------------------------------------------------------------------------------------------------------------------------------------------------------|-------------------------------------------------------------|--------------------------------------------------------------|--------------------------------------------------------------------------------------------------------------|
| Cambrian Terreneuvian<br>(Fortunian, Kuanchuanpu<br>Formation, South China)                                 | <i>Hanagyroia orientalis</i> Wang et al., 2020                                                                                                                       | Embryonic<br>fossils<br>(exoskeleton-<br>bearing)           | Medusozoan?<br>(Olivoodae)                                   | <b>Wang et al., 2020</b>                                                                                     |
|                                                                                                             | <i>Qinscyphus necopinus</i> Liu et al., 2017                                                                                                                         |                                                             | Cnidarian?<br>(Olivoodae)                                    | <b>Liu et al., 2017; Shao et al., 2018</b>                                                                   |
|                                                                                                             | <i>Sinaster petalon</i> Wang et al., 2017                                                                                                                            |                                                             | Medusozoan?<br>(Olivoodae)                                   | <b>Wang et al., 2017</b>                                                                                     |
|                                                                                                             | <i>Quadrapyrgites quadratacris</i> Li, 1984                                                                                                                          |                                                             | Scyphozoan;<br>Cycloneuralian<br>(Olivoodae)                 | <b>Liu, Y. et al., 2014a;<br/>Steiner et al., 2014</b>                                                       |
|                                                                                                             | <i>Olivoooides</i> Qian, 1977 ( <i>O. multisulcatus</i> Qian, 1977; <i>O. mirabilis</i> Yue in Xing et al., 1984 = <i>Punctatus emeiensis</i> He in Yin et al. 1980) |                                                             | Scyphozoans;<br>Cycloneuralians;<br>Cubozoans<br>(Olivoodae) | <b>Bengtson and Zhao, 1997; Dong et al., 2013; Dong et al., 2016; Han et al., 2013; Steiner et al., 2014</b> |
|                                                                                                             | <i>Eolympia pediculata</i> Han et al., 2010                                                                                                                          |                                                             | Hexacorallian;<br>Scalidophoran                              | <b>Han et al., 2010; Liu, Y. et al., 2014b</b>                                                               |
|                                                                                                             | Carinachitidae He, 1987<br>(Genera: <i>Carinachites</i> Qian, 1977; <i>Emeiconularia</i> Qian et al. 1997)                                                           |                                                             | Conotubular<br>microfossils<br>(exoskeleton-<br>bearing)     | Conulariids-like,<br>cnidarians?                                                                             |
| Cambrian Terreneuvian<br>(Fortunian, Kuanchuanpu<br>Formation, South China; Stage<br>2, Yanjiahe Formation) | Hexangulaconulariidae He, 1987<br>(Genera: <i>Arthrochites</i> Chen, 1982; <i>Hexaconularia</i> He et Yang, 1986)                                                    | Conical-shaped<br>microfossils<br>(exoskeleton-<br>bearing) | Conulariids-like,<br>medusozoans<br>(scyphozoans)?           | <b>Conway Morris and Chen, 1992; Duan et al., 2017; Guo et al., 2020b; Guo et al., 2021;</b>                 |



| Occurrence                                                                                                                                           | Taxa                                                                                                                                                                                                                              | Type                                                     | Affinity                                        | Key references                                                                                                                                            |
|------------------------------------------------------------------------------------------------------------------------------------------------------|-----------------------------------------------------------------------------------------------------------------------------------------------------------------------------------------------------------------------------------|----------------------------------------------------------|-------------------------------------------------|-----------------------------------------------------------------------------------------------------------------------------------------------------------|
|                                                                                                                                                      | = <i>Pseudoooides</i> Qian, 1977;<br><i>Septuconularia</i> Guo et al.,<br>2020; <i>Decimoconularia</i> Guo et al.,<br>2021)                                                                                                       |                                                          |                                                 | <i>Van Iten et al., 2010</i>                                                                                                                              |
| Cambrian Terreneuvian<br>(Worldwide distribution, e.g.<br>Siberian Platform, Western<br>Mongolia, China, Eastern and<br>Western Gondwana, Laurentia) | Anabaritidae Missarzhevsky, 1974<br>(Genera e.g. <i>Anabarites</i><br>Missarzhevsky in Voronova and<br>Missarzhevsky, 1969; <i>Cambrotubulus</i><br>Missarzhevsky in Rozanov et al.,<br>1969; <i>Selindeochrea</i> Val'kov, 1982) | Conotubular<br>microfossils<br>(exoskeleton-<br>bearing) | Cnidarians?;<br>Diploblastic-grade<br>metazoans | <i>Kouchinsky et al., 2009</i> ;<br><i>Steiner et al., 2004</i>                                                                                           |
| Late Ediacaran (Ust'-Pinega<br>Formation, Russia)                                                                                                    | <i>Vendoconularia triradiata</i> Ivantsov et<br>Fedonkin, 2002                                                                                                                                                                    | Macrofossil<br>(exoskeleton-<br>bearing)                 | Conulariid-like;<br>Cnidarian?                  | <i>Ivantsov and Fedonkin,</i><br><i>2002</i>                                                                                                              |
| Late Ediacaran (Tamengo<br>Formation, Brazil; Wood<br>Canyon Formation, USA;<br>Kushk Series, Iran)                                                  | <i>Corumbella wernerii</i> Hahn et al., 1982                                                                                                                                                                                      | Conotubular<br>macrofossil<br>(exoskeleton-<br>bearing)  | Thecate<br>scyphopolyp;<br>Annelid              | <i>Babcock et al., 2005</i> ;<br><i>Hahn et al., 1982</i> ;<br><i>Pacheco et al., 2015</i> ;<br><i>Vaziri et al., 2018</i> ;<br><i>Walde et al., 2019</i> |
| Late Ediacaran (Chace Range in<br>South Australia; White Sea area<br>in Russia)                                                                      | <i>Inaria karli</i> Gehling, 1988                                                                                                                                                                                                 | Mould<br>macrofossil                                     | Actiniarian                                     | <i>Gehling, 1988</i> ;<br><i>Grazhdankin, 2000</i>                                                                                                        |
| Late Ediacaran (Fermeuse<br>Formation Newfoundland, ~<br>560 Ma)                                                                                     | <i>Haootia quadriformis</i> Liu et al., 2014                                                                                                                                                                                      | Impression<br>macrofossil                                | Benthic staurozoan                              | <i>Liu, A. G. et al., 2014</i>                                                                                                                            |

| Occurrence                                                          | Taxa                                      | Type                                 | Affinity                                 | Key references                                           |
|---------------------------------------------------------------------|-------------------------------------------|--------------------------------------|------------------------------------------|----------------------------------------------------------|
| Ediacaran (Lantian Formation, southern Anhui Province, South China) | <i>Lantianella laevis</i> Wan et al. 2016 | Carbonaceous compression macrofossil | Conulariids-like; Macroalgae; Cnidarian? | <i>Van Iten et al., 2013;</i><br><i>Wan et al., 2016</i> |

## Phylogenetic information

Our character dataset was mainly adopted from Zhao et al. (**Zhao et al., 2019**), which includes the main taxa and characters of cnidarians and ctenophores. Our changes to previously existing characters were mainly deleting duplicate or meaningless characters, correcting some mistakes and reordering most of characters. We deleted some redundant taxa (mainly octocorals and siphonophores) as well as *Eolympia* and *Namacalathus* that are useless in current studies. Except for *Conicula*, we also added 16 newly sampled taxa, including extant cnidarian *Edwardsia*, *Zoanthus*, *Craterolophus*, *Carybdea*, *Chiropsalmus*, *Carukia*, *Atorella*, *Linuche*, *Craterithea* and *Halammohydra*, and tubular fossils *Corumbella*, *Conularia*, *Coconularia*, *Hexaconularia* and *Carinachites*, and cup-shaped cnidarian fossil *Cambroctoconus*.

The phylogeny analyses were conducted using Bayesian inference under the mkv + gamma model in MrBayes 3.2.7 (**Ronquist et al., 2012**). We set the number of generations to be 20,000,000 and allowed the stop rule when the average deviation of split frequencies dropped below 0.01, with convergence checked for all parameters (ESS scores >200) using the command 'sump'. We performed two sets of analyses without any topological constraints (convergence was achieved after <6,000,000 generations in both analyses), one included all sampled taxa and the other removed the newly sampled tubular fossils and *Cambroctoconus*, of which all lack the preservation of reliable soft tissues and therefore have large amounts of missing data (over 80%). However, some recovered clades within the cnidarian have in-group relationships that are inconsistent with the results of recent phylogenomic analyses (**Kayal et al., 2018; e.g. McFadden et al., 2021; Zapata et al., 2015**). To get further results of the position of *Conicula* in phylogenetic trees, we conducted additional analyses using the command of 'constraint partial'. All fossil taxa were left unconstrained, so they can wander to any clades in the tree. The first topological constraint was combined with the recent common results of phylogenomic studies in cnidarian clades (**Collins et al., 2006; e.g. McFadden et al., 2021**). While the second focused on the ctenophore-first (ctenophores are the sister group to all other metazoans including sponges) (e.g. **Dunn et al., 2008; Whelan et al., 2017**) and Planulozoa (for this paper, we only considered cnidarians as the sister group to bilaterians, with the exclusion of Placozoa) (e.g. **Pisani et al., 2015; Simion et al., 2017**). Our commands using for implementing topological constraints in MrBayes 3.2.7 are listed below.

## Character descriptions

The new characters are in bold type and marked with an asterisk.

1. Collar complex

0 – absent    1 – present

2. Multicellularity with extracellular matrix

0 – absent    1 – present

3. Extracellular digestion

0 – absent    1 – present

4. Ostia with porocytes

0 – absent    1 – present

5. Septate junctions (SJs)

0 – absent    1 – present

6. Tight junctions (TJs)

0 – absent    1 – present

7. Gap junctions (GJs)

0 – absent    1 – present

8. Adherens junctions (AJs)

0 – absent    1 – present

9. Hemidesmosomes

0 – absent    1 – present

10. Epithelia

0 – absent    1 – present

11. Basal laminae

0 – absent    1 – present

12. Collagen

0 – absent    1 – present

13. Nerve cells

0 – absent    1 – present

14. Acetylcholine used as a neurotransmitter

0 – absent    1 – present

15. Diffuse nervous system

0 – absent    1 – present

16. Hox/ParaHox gene

0 – absent    1 – present

17. Epidermis with pulsatile bodies

0 – absent    1 – present

18. Xenacoelomorph cilia

0 – absent    1 – present

19. Striated ciliary rootlets

0 – absent    1 – present

20. Diploblasts made of 2 cell layers



0 – absent    1 – present

21. Triploblasts made of 3 cell layers

0 – absent    1 – present

22. Spiral cleavage with 4d mesoderm

0 – absent    1 – present

23. Through-gut

*Conicula* possesses a partitioned, blind gut with only one opening, the type of gut is incompatible with the through-gut bearing two separated openings. Therefore, the character of through-gut is scored as absent in *Conicula*.

0 – absent    1 – present

24. U-shaped gut

0 – absent    1 – present

25. Protonephridia (or homologues)

0 – absent    1 – present

26. Fate of blastopore

0 – protostomy    1 – deuterostomy    2 – amphistomy

27. Body cuticle with chitin

0 – absent    1 – present

28. Body cuticle with  $\alpha$ -chitin

0 – absent    1 – present

29. Body cuticle moulted

0 – absent    1 – present

30. Segmented body with jointed limbs

0 – absent    1 – present

31. Lobopods

0 – absent    1 – present

32. Slime papillae

0 – absent    1 – present

33. Telescoping mouth cone with protrudable stylets

0 – absent    1 – present

34. Respiration via metameric tracheae and spiracles

0 – absent    1 – present

35. Teloblastic segmentation

0 – absent    1 – present

36. Longitudinal ventral nerve cord(s)

0 – absent    1 – present

37. Circum-pharyngeal, collar-shaped brain with anterior and posterior rings of perikarya separated by a ring-shaped neuropil

0 – absent    1 – present

38. Introvert with scald rings

0 – absent    1 – present

39. Flosculi

0 – absent    1 – present

40. Immunoreactivity of horseradish peroxidase (HRP)

0 – absent    1 – present

41. Lophophore

0 – absent    1 – present

42. Trochophore

0 – absent    1 – present

43. Radula

0 – absent    1 – present

44. Segmental metanephridia sacculus

0 – absent    1 – present

45. Chitinous microvillar appendages (chaetae)

0 – absent    1 – present

46. Parapodia with dorsal and ventral branches terminated by  $\beta$ -chitinous chaetae

0 – absent    1 – present

47. Eversible proboscis surrounded by rhynchocoel

0 – absent    1 – present

48. Complex jaw apparatus in pharynx

0 – absent    1 – present

49. Mesoderm

0 – absent    1 – present

50. Origin of mesoderm

0 – from the blastopore lips and as ectomesoderm

1 – from the walls of the archenteron or neural crest

51. Mixocoel (haemocoel) surrounded by segmented mesoderm

0 – absent    1 – present

52. Radial cleavage

0 – absent    1 – present

53. Coelom formation

0 –schizocoely    1 –enterocoely

54. Trimeric coelom

0 – absent    1 – present

55. Pharyngeal slits

0 – absent    1 – present

56. Endostyle (or homologues)

0 – absent    1 – present

57. Notochord

0 – absent    1 – present

58. Stomochord

0 – absent    1 – present

59. Haemal system with axial complex

0 – absent    1 – present

60. Calcareous endoskeleton composed of separate ossicles

0 – absent    1 – present

61. Tornaria type larva

0 – absent    1 – present

62. Longitudinal dorsal nerve cord

0 – absent    1 – present

63. Zig zag myomeres

0 – absent    1 – present

64. Endothelium that lines the inner wall of blood vessels

0 – absent    1 – present

65. Neural crest

0 – absent    1 – present

66. Neurogenic placodes

0 – absent    1 – present

67. Dorsoventral axis

0 – absent    1 – present

68. Anterior posterior axis

0 – absent    1 – present

**69. Symmetry\***

The single character of symmetry in Zhao et al. (character 69)(**Zhao et al., 2019**) is now split into two characters (69 and 70) to establish character polarity, as scoring the different types of symmetry would necessitate scoring the character of symmetry as absent for Choanoflagellata and Placozoa. The character is here scored as polymorphic for Porifera because the symmetry is present only in some subgroups of sponges, such as calcareous sponges (**Manuel, 2009**) or Palaeozoic sponges (**Botting et al., 2014**). The material of *Conicula* exhibits a circular cross-section, along with the conical gross morphology (with oral-aboral axis), suggesting the presence of symmetric nature.

0 – absent    1 – present

70. Type of symmetry

We are careful to score this character as uncertain in *Conicula* because the total number of tentacles or mesenteries in current material is yet to be determined.

0 – bilateral      1 – biradial      2 – triradial  
3 – tetradial      4 – pentaradial    5 – hexaradial

71. Compression in pharyngeal plane

0 – absent    1 – present

72. Compression in oral aboral axis

0 – absent    1 – present

73. Compression in tentacular plane

0 – absent    1 – present



74. Cydippid larvae

0 – absent    1 – present

75. Ciliary rosettes

0 – absent    1 – present

76. Radially-arranged outgrowths from the interface between the oral and aboral regions

*Conicula* possesses soft outgrowths (tentacles) extending from the oral disc of the polyp, so this character is scored as present in *Conicula*.

0 – absent    1 – present

77. Radial outgrowths fixed in globular configuration

0 – absent    1 – present

78. Radial outgrowths tentacular

0 – absent    1 – present

79. Outgrowths with pinnules

The tentacles in *Conicula* are unbranched with no signs of the existence of pinnules. We also code this character as inapplicable in those taxa without tentacular outgrowth because the possession of pinnules is contingent on the presence of tentacles.

0 – absent    1 – present

80. Outer sheaths on external surface of radial outgrowths

This character is coded as absent in *Conicula* because no evidence of outer sheaths is present in the external surface of the outgrowths in *Conicula*.

0 – absent    1 – present

81. Outgrowths with ciliary rows

0 – absent    1 – present

82. Ciliary rows paired

0 – paired    1 – unpaired

83. Orientation of ciliary rows relative to oral-aboral axis

0 – adaxial    1 – abaxial

84. Uniformity of ciliary rows

0 – uniform    1 – non uniform

85. Number of ciliary rows

0 – eight            1 – eighteen            2 – six

3 – twenty four    4 – more than 24    5 – sixteen

86. Cushion rings/plates or polster cells

0 – absent    1 – present

87. Cushion rings paired

0 – paired    1 – unpaired

88. Large compound cilia

0 – absent    1 – present

89. Large cilia fused to form locomotory plate

0 – absent    1 – present

90. Extension of the oral surface to form oral cone

0 – absent    1 – present

91. Aboral region represented only by apical organ

0 – absent    1 – present

92. Apical organ forming narrow pointed extension

0 – absent    1 – present

93. Oral macrocilia

0 – absent    1 – present

94. Oral lobes

0 – absent    1 – present

95. Morphology of tip of oral extension

0 – narrow    1 – voluminous    2 – manubrium-like

96. Mouth as margin of creeping sole

0 – absent    1 – present

97. Pharyngeal ridges

0 – absent    1 – present

98. Sealing ridges of pharynx

0 – absent    1 – present

99. Macrocilia on pharynx lining inside of mouth

0 – absent    1 – present

100. Ciliary dome

0 – absent    1 – present

101. Statolith

0 – absent    1 – present

102. Balancers

0 – absent    1 – present

103. Pole plates

0 – absent    1 – present

104. Aboral papillae

0 – absent    1 – present

105. Ciliary grooves

0 – absent    1 – present

106. Interplate ciliary groove (ICG)

0 – absent    1 – present

107. Pharyngeal canals

0 – absent    1 – present

108. Tentacular canals

0 – absent    1 – present

109. Meridional canals

0 – absent    1 – present



110. Diverticula of meridional canals

0 – absent    1 – present

111. Circumoral ring canal

0 – absent    1 – present

112. Termination of meridional and pharyngeal canals

0 – both terminate blindly

1 – branch to form a complex network

2 – united with the circumoral ring canal

113. Interradial canals

0 – absent    1 – present

**114. Number of interradian canals\***

This character ‘interradian canals’ in the previous matrix combined the presence and number of interradian canals (*Zhao et al., 2019*), and is now split into two separate characters.

0 – two        1 – four

115. Adradial canals

0 – directly branch from the infundibulum

1 – branch from interradian canals

116. Aboral canal

0 – absent    1 – present

117. Anal canals

0 – absent    1 – present

118. Anal pores

0 – absent    1 – present

119. Paired ctenophore Tentacles

0 – absent    1 – present

120. Colloblasts

0 – absent    1 – present

121. Tentilla

0 – absent    1 – present

122. Disposition of tentilla

0 – fringing along tentacles    1 – fringing along elongate oral margin

123. Tentacle sheaths

0 – absent    1 – present

124. Opening position of tentacles

0 – orally    1 – aborally

125. Auricles

0 – absent    1 – present

126. Brood chambers

0 – absent    1 – present

127. Sclerotised arms and calyx

0 – absent    1 – present

128. Tentacles extending beyond skeletal rods and outer sheaths

0 – absent    1 – present

129. Medial structures of skeletal elements

0 – absent    1 – present

130. Kinked spokes

0 – absent    1 – present

131. Spinose spokes

0 – absent    1 – present

132. Radiating flaps/lobes

0 – absent    1 – present

133. Oral structure separated by circumferential constriction

0 – absent    1 – present

134. Constriction type

0 – skirt or bell    1 – lappets

135. Feeding strategy in tentaculate metazoans

Metazoans who rely on pinnules/cilia to feeding are defined as the suspension-feeding groups, of which feeding strategies are mainly the granules suspended in the water current. Those metazoans bearing flexible, non-cilia tentacles are usually preying on macro-organisms. *Conicula* has flexible, free bending tentacles, with no clear signs of pinnules/cilia, it is coded as predominantly macro for feeding strategy.

0 – predominantly micro      1 – predominantly macro

136. Mesoglea

0 – absent    1 – present

137. Mesoglea cellular

0 – absent    1 – present

138. Embryonic development

0 – direct    1 – indirect

139. Structure of mitochondrial DNA

0 – circular    1 – linear

140. Cnidae

0 – absent    1 – present

141. Cnidae in gastrodermis

0 – absent    1 – present

142. Cnidocil

0 – absent    1 – present

**143. Cnidae apical structure\***

The typical feature of anthozoan cnidae is the absence of operculum (*Brusca et al., 2016*), and we score the sampled taxa mainly following Reft & Daly (*Reft and Daly, 2012*).

0 – flaps/cap      1 – operculum      2 – no flaps/operculum



144. Spirocyst

0 – absent    1 – present

145. Ptychocyst

0 – absent    1 – present

146. Stenoteles

0 – absent    1 – present

147. Euryteles

0 – absent    1 – present

148. Birhopaloids

0 – absent    1 – present

149. Rhopalonemes

0 – absent    1 – present

150. Desmonemes

0 – absent    1 – present

151. Mastigophores

0 – absent    1 – present

152. Isorhizas

0 – absent    1 – present

153. Basitrichous isorhizas

0 – absent    1 – present

154. Apotrichous isorhizas

0 – absent    1 – present

155. Heterotrichous anisorhizas

0 – absent    1 – present

**156. Nemathybomes on scapus\***

*Edwardsia* is characterised by prominent nemathybomes that is nematocyst-dense pockets in the epidermis, which is absent in *Nematostella* (**Daly, 2002**). It is inapplicable in other cnidarians as their body column is not composed of scapus.

0 – absent    1 – present

157. Zooxanthellae

0 – absent    1 – present

158. Mesogleal skeleton

0 – absent    1 – present

159. Ectodermal skeleton

0 – absent    1 – present

160. Composition of ectodermal skeleton

0 – proteinaceous    1 – calcitic

**161. Corallum\***

Corallum is a spiny, proteinaceous skeleton type widely present in Antipatharia (**Daly et al., 2007**).

0 – absent    1 – present

162. Columella

0 – absent    1 – present

163. Costae

0 – absent    1 – present

164. Octocorallian spicules

0 – absent    1 – present

165. Spicules in tentacle

0 – absent    1 – present

166. Gorgonin

0 – absent    1 – present

167. Periderm

Considering the chemical composition varies in different types of periderm based on Mendoza-Becerril et al. (**Mendoza-Becerril et al., 2016**), we also code the periderm as present in *Hydra*. *Cornularia* is a unique genus among Octocorallians in having a polyp covered by a theca-like chitinous outer sheath (**López-González et al., 1995; Weinberg, 1978**), we score *Cornularia* as present for a periderm as well. The conical external skeleton of *Conicula* is a robust structure ornamented by parallel annulations, encasing fully the internal polyp. These features are consistent with the tubular fossils with an external periderm, such as conulariids. We therefore code periderm as present in *Conicula*.

0 – absent    1 – present

168. Periderm type

Based on Mendoza-Becerril et al., the periderm is assigned into two types of corneous (chitin-protein) and coriaceous (calcium carbonate/phosphate), the former is widely

present in extant organisms, while the latter is thought to be present in a few of Anthoathecata, such as *Millepora*, and most of fossil groups, like conulariids and *Corumbella* (**Mendoza-Becerril et al., 2016**). *Cornularia* is coded as having the corneous type of periderm because of the possession of a chitinous envelope (**López-González et al., 1995; Weinberg, 1978**). It is unknown the peridermal type of *Conicula* based on current evidence.

0 – corneous      1 – coriaceous      2 – fibrous

#### 169. Cuticle layers in periderm

Conulariids had found evidence of two-layer cuticle present in the periderm (**Jerre, 1994; Van Iten, 1992a**). *Corumbella* may have one-layer cuticle in the periderm (**Mendoza-Becerril et al., 2016**). While the number of cuticle layers in *Conicula* is uncertain.

0 – one      1 – two      2 – five

#### 170. Regions with periderm\*

A new character describes the body region encased by the periderm and is scored mainly following Mendoza-Becerril et al. (**Mendoza-Becerril et al., 2016**). Basing on fossil material, *Conicula* and other tubular fossils have a periderm encasing the entire polyp.

0 – entire polyp  
1 – hydrocaulus or hydrorhiza  
2 – basal region or podocyst  
3 – stolon and anthostele

#### 171. Tubular periderm\*

A new character defines the shape of periderm. The tubular periderm is present in most of extant taxa that have a periderm encasing the entire polyp or hydrocaulus. It also appears in *Conicula* and other tubular fossils, including conulariids, olivoids, *Hexaconularia*, *Carinachites*, *Corumbella* and *Sphenothallus*.

0 – absent      1 – present



### **172. Shape of tubular periderm\***

Coronates, *Conicula* and tubular fossils have a cone-shaped periderm, while hydrozoans have two types of tubular periderm shape that are contingent on the encased region of the periderm.

0 – cone            1 – tube            2 – goblet-like

### **173. Cone slender and elongate\***

Coronates possess a slender and elongate cone that differs from the pyramid-shaped or conical fossil tubes (such as conulariids and *Conicula*), except for the tubes of *Sphenothallus* (**Dzik et al., 2017**) and *Corumbella* (**Pacheco et al., 2015**) that appear to slender and elongate.

0 – absent    1 – present

### **174. Tapering end of cone\***

There is a disc-like attachment structure present in the tapering end of the cone of coronates, similar structure could be also seen in the cone of *Sphenothallus* (**Dzik et al., 2017**). *Conicula*, olivoids (**Dong et al., 2016; Liu, Y. et al., 2014a**), *Hexaconularia* (**Van Iten et al., 2010**) and *Carinachites* (**Han et al., 2018**) lack the structure of attachment disc but instead exhibit a blunt tapering end. It is uncertain that conulariids have an attachment disc, because it is usually broken off at the tapering end of fossil specimens.

0 – blunt    1 – with an attachment disc

### **175. Periderm forming a globular expansion\***

This new character defines the periderm shape of *Conicula*. All fossil and living taxa with a tubular periderm do not expand the tube to form a globular chamber in the distal region, and this character is scored as absent in them.

0 – absent    1 – present

### **176. Periderm with face\***

Unlike the periderm of extant taxa, the periderm is divided into various numbers of faces in conulariids, olivoids, *Hexaconularia* and *Carinachites*. We follow the most

common opinion to code the peridermal face as present in *Corumbella* (**Babcock et al., 2005; Pacheco et al., 2011; Pacheco et al., 2015; Van Iten et al., 2016**). This character is absent in *Conicula* and *Sphenothallus* since there are no evident faces present in fossil material.

0 – absent    1 – present

#### **177. Face divided by corner groove\***

This character is generally present in conulariids (**Leme et al., 2008b**), *Hexaconularia* (**Van Iten et al., 2010**) and *Carinachites* (**Conway Morris and Chen, 1992**), but is absent in *Olivoides* (divided by longitudinal ridges) and *Corumbella*.

0 – absent    1 – present

#### **178. Corner groove wide and deep\***

*Carinachites* possesses wide and deep grooves with triangular shape in cross-section (**Han et al., 2018**), which are distinct from the narrow and shallow grooves that appear in conulariids and *Hexaconularia*.

0 – absent    1 – present

#### **179. Midline\***

The character of midline is widely present in the middle of the face of conulariids (**Van Iten, 1992b**), but is absent in olivoids, *Hexaconularia* and *Carinachites*. We score this character as present in *Corumbella* following the common opinion (**Babcock et al., 2005; Pacheco et al., 2011; Pacheco et al., 2015; Van Iten et al., 2016**).

0 – absent    1 – present

#### **180. Carinae\***

This character is widely present in the internal periderm of conulariids (**Van Iten, 1992b**), and is absent in *Corumbella* following the recent study (**Pacheco et al., 2015**).

0 – absent    1 – present

#### **181. Bipartite periderm stage\***

This character is adopted from character 203 ‘embryonic stage retained in the tube morphology’ in previous matrix (*Zhao et al., 2019*). The tubular periderms of olivoids and *Hexaconularia* are consisting of two distinct body parts, the embryonic tissue and the post-embryonic tissue (*Steiner et al., 2014; Van Iten et al., 2010*). Extant cnidarians experience a planula phase before forming a polypoid or medusoid body, without a bipartite periderm stage at early development phase. We score this character as absent in extant cnidarians with a tubicolous periderm and as unknown in all other tubular fossils.

0 – absent    1 – present

### **182. Apical region with longitudinal ridge\***

Olivoids have longitudinal ridges in the apical cone (embryonic tissue) that play a crucial role to determine the symmetric type (*Steiner et al., 2014*). *Hexaconularia* appears to with no evident ridges in the apical region (*Duan et al., 2017*).

0 – absent    1 – present

### **183. Number of ridges\***

*Olivoides* has five ridges in the apical cone (*Dong et al., 2016*), while *Quadrupyrgites* exhibits four ridges (*Liu, Y. et al., 2014a*).

0 – four      1 – five

### **184. Periderm apertural end\***

This new character describes differences of the apertural end of periderm across sampled taxa. The distal portion of periderm tube protrudes towards the central lumen to form apertural lobes surrounding the terminal opening, as seen in conulariids (*Moore, 1956*), olivoids (*Dong et al., 2016; Liu, Y. et al., 2014a*) and *Carinachites* (*Han et al., 2018*). The operculum appeared in the periderm tube of hydrozoan (*Bouillon et al., 2006*) and coronates (*Werner, 1973*). *Sphenothallus* (*Chang et al., 2018; Dzik et al., 2017*) and *Corumbella* (*Babcock et al., 2005; Pacheco et al., 2015*) do not develop an apertural operculum or oral lobes. *Conicula* and *Hexaconularia* are scored as unknown as it is uncertain based on current fossil material.

0 – open      1 – with lobes      2 – with an operculum

### 185. Cross-section of the terminal end of periderm\*

This character is adopted from character 1 of Leme et al. (**Leme et al., 2008a**). The circle-shaped cross-section of the terminal end of periderm is present in *Conicula*, *Sphenothallus* and extant hydrozoans and coronates. In contrast, conulariids, olivoids, *Hexaconularia*, *Carinachites* and *Corumbella* have various types of polygonal cross-sections.

0 – circular    1 – polygon

### 186. Peridermal tooth

This character is modified based on the code in Zhao et al. (**Zhao et al., 2019**). Peridermal teeth refer to the inward protrusion of the inner layer periderm to form ridge-like or tooth-like structures towards the lumen. We now score the peridermal tooth as inapplicable in the taxa without a periderm. Several hydrozoans possess intrathecal septa or ridges within the periderm that is presumably homologous to the teeth or ridges of the periderm tube. We hereby add a new taxa *Crateritheca* with prominent intrathecal septa (**Bouillon et al., 2006; Millard, 1975**) into the sampled taxa.

0 – absent    1 – present

### 187. Tooth morphology\*

*Olivoides* has peridermal teeth in the form of paired projections (**Dong et al., 2016**). *Sphenothallus* possesses simple sheet-like cusps (ridges) with smooth rim (**Dzik et al., 2017**), which may present in *Eoconularia* (**Jerre, 1994**) and *Conicula* as well. We also code *Crateritheca* as having sheet-like cusps in the perisarc (**Bouillon et al., 2006; Millard, 1975**). Coronates bear complex peridermal teeth with various shapes (**Jarms, 1991; Jarms et al., 2002**).

0 – paired projections

1 – sheet-like cusps (ridges)

2 – teeth-like cusps

### 188. Tooth disposition\*

*Sphenothallus* (**Dzik et al., 2017**), *Eoconularia* (**Jerre, 1994**) and extant *Crateritheca* (**Millard, 1975**) have irregular arrangements of internal ridges. *Conicula*, *Olivoides*



(*Dong et al., 2016*) and extant coronates (*Jarms, 1991; Jarms et al., 2002*) have peridermal teeth arranged in the whorls.

0 – irregular arrangement      1 – whorl

#### **189. Periderm with annulation\***

The external annulation in the periderm is widely present in the tubular fossil groups, including conulariids, olivoids, *Corumbella*, *Carinachites* and *Conicula*, as well as in extant coronates and most hydrozoans. Most tubes of *Sphenothallus* do not have obvious annulations, but some of them exhibit faint, fine striae (*Chang et al., 2018; Muscente and Xiao, 2015; Zhu et al., 2000*), we also code annulation as present in the tube of *Sphenothallus*.

0 – absent      1 – present

#### **190. Annulation distribution\***

Most external annulations in the periderms of hydrozoans are confined to the basal portion, and this phenomenon appears also in *Conicula*. We score the external annulations in coronates, conulariids, olivoids, *Sphenothallus*, *Corumbella* and *Carinachites* as widespread in the periderm tube.

0 – confined to basal part      1 – widespread in periderm

#### **191. Annulation continuous**

The annulations in extant coronates and hydrozoans are continuous around the entire periderm. We score the continuous annulation as present also in *Conicula*, *Sphenothallus* and olivoids since they do not have external midlines or corner grooves.

0 – absent      1 – present

#### **192. Location of annulation offset\***

Conulariids are coded following characters 5 and 6 of Leme et al. (*Leme et al., 2008a*). The annulations of *Corumbella* (*Pacheco et al., 2015*) and *Hexaconularia* (*Van Iten et al., 2010*) offset in the midlines, and the annulations are interrupted in the corner sulcus of *Carinachites* (*Conway Morris and Chen, 1992*).

0 – interradii (midlines)    1 – perradii (corners)

### 193. Annulation type\*

Based on the morphology of external annulations preserved in the fossil material, we score olivoids as the special crest-like annulations (**Dong et al., 2016; Liu, Y. et al., 2014a**), while living hydrozoans and coronates as well as *Conicula* and other tubicolous periderms (**Babcock, 1991**) exhibit the rib-like annulations, except for *Sphenothallus*, which has faint, fine striae that distinctly differ from the rib-like annulations (**Chang et al., 2018; Zhu et al., 2000**).

0 – rib-like    1 – crest-like    2 – striae

### 194. Ornament in rib\*

The external annulations in extant coronates and hydrozoans are smooth without ornaments, which are also applicable in *Conicula*, *Sphenothallus*, *Carinachites* and *Corumbella*. The ornaments in ribs of conulariids are variable across different taxa (**Leme et al., 2008a**). *Eoconularia* does not have ornaments in the transverse ribs, while *Conularia* has nodes in the transverse ribs (**Babcock, 1991; Leme et al., 2008a**).

0 – absent    1 – present

### 195. Propagation through lateral budding

0 – absent    1 – present

### 196. Oocyte development

0 – oocytes develop without accessory cells

1 – oocytes develop with accessory cells

2 – oocytes develop within follicles

3 – oocytes develop from uptake of somatic or other germ line cells

### 197. Nectosome

0 – absent    1 – present

198. Pneumatophore

0 – absent    1 – present

199. Planula

0 – absent    1 – present

200. Planula ciliation

0 – absent    1 – present

201. Number of endodermal cells of the planula

0 – variable    1 – constant, n=16

202. Glandular cells in the planula

0 – absent    1 – present

203. Nervous cells in the planula

0 – absent    1 – present

204. Relationship between axes of planula and adult

0 – oral-aboral axis in the adult derived from the longitudinal axis of the planula

1 – oral-aboral axis in the adult derived from the transverse axis of the planula

205. Polypoid phase

In previous matrix *Aegina* and *Halitrephes* had been incorrectly coded as the presence of a polypoid phase (**Zhao et al., 2019**), we now rescored it as absent in these two taxa and newly sampled *Halammohydra*, and accordingly change other characters contingent on the presence of a polypoid phase to inapplicable in these three taxa.

0 – absent    1 – present

206. Polyp life mode

In all specimens, *Conicula* is living in solitary, neither with no signs of attaching to/with one another, or no stolon or other connected structures present.

0 – solitary    1 – colonial

207. Polymorphic polyps

0 – absent    1 – present

**208. Polyp dominant\***

Anthozoans only have a polyp phase. Although most medusozoans have polyp and medusa phases, the two phases are not equally important during the life cycles. The medusa phase is dominant in scyphozoans, cubozoans and staurozoans, while the polyp phase is generally dominant in hydrozoans.

0 – absent    1 – present

209. Stalk/peduncle in polyp

This character has changed inapplicable in the bilaterians which are here regarded as no polyps present. *Conicula* is scored as present for a peduncle based on a narrower ribbon-like structure extending from the aboral end in the fossil material.

0 – absent    1 – present

210. Pedal disc

0 – absent    1 – present

211. Coelenteron

Several lines of evidence indicate that *Conicula* possesses coelenteron-like features, including a blind cavity lined by mesenteries and an anthozoan-like pharynx. We score the coelenteron is present in *Conicula*

0 – absent    1 – present

212. Actinopharynx



Actinopharynx refers to a short, muscular tubular passageway located between the mouth and gastric cavity in a polyp, which is formed by the invagination of the epidermis (**Daly et al., 2007**). *Conicula* has a distinct tubular structure similar to the actinopharynx in some aspects, including shape, topological location and dimension. We score actinopharynx as present in *Conicula*.

0 – absent    1 – present

#### 213. Siphonoglyph

This character was repeated in the previous matrix (characters 145 and 199) (**Zhao et al., 2019**). We retain the ‘character 199’ as it was correctly coded siphonoglyph as absent in *Corynactis*, *Montastraea* and *Porites* based on Daly et al. (**Daly et al., 2003**).

0 – absent    1 – present

#### 214. Number of siphonoglyphs

0 – one        1 – more than one

#### 215. Gastric cavity partitioned by mesentery

The dark longitudinal lines preserved only in the region of gastric cavity indicate the presence of mesentery in *Conicula*.

0 – absent    1 – present

#### **216. Mesenterial filament \***

We split the character ‘mesenteric filament’ in the previous matrix (character 201) (**Zhao et al., 2019**) into two separate characters. One is for the presence of mesenterial filament and the other one is considering the number of mesenterial filament strips. Mesenterial filament refers to the thickened, cordlike margin armed with cnidae, cilia and gland cells, which occurs in the free inner edge of each mesentery below the pharynx (**Brusca et al., 2016**). The gastric septa of medusozoan polyp lack the mesenterial filaments.

0 – absent    1 – present

#### 217. Number of mesenterial filament strips

0 – two strips      1 – three strips      2 – one strip

218. Ciliated tract on mesenterial filament

0 – absent      1 – present

219. Acontia

Acontia are long thread-like extensions of the lower ends of mesenterial filaments, which are armed with numerous stinging cells (**Lam et al., 2017**). We rescore it as inapplicable in these taxa without mesenterial filaments.

0 – absent      1 – present

**220. Number of mesenteries\***

The sampled hexacorallians have more than twelve mesenteries in total except *Antipathes* which has only ten mesenteries. The sampled octocorallians have eight mesenteries, which is also scored as present in *Cambroctoconus* (**Park et al., 2011**). The sampled scyphozoans, cubozoans and staurozoans have four gastric septa that are also appeared in *Eoconularia* (**Jerre, 1994**). The estimated number of mesenteries is up to 28 in *Conicula* based on fossil material, and therefore we code *Conicula* as present for more than twelve mesenteries.

0 – more than twelve      1 – ten  
2 – eight      3 – four

221. Mesentery in polyp

Cubopolyps have gastrodermal folds instead of the true gastric septa (**Marques and Collins, 2004**), we therefore code the mesentery is absent in cubopolyps (**Straehler-Pohl and Jarms, 2011**). This character is rescored as inapplicable in *Aegina*, *Halitrephes* and *Halammohydra* since they develop directly to the medusae phase with no polyps present.

0 – absent      1 – present

**222. Coupled mesenteries\***

We follow Daly et al. (**Daly et al., 2003**) to split the character 'Pairing of mesentery' of

the previous matrix (**Zhao et al., 2019**) into two separate characters (coupled mesenteries and paired mesenteries), and score them accordingly.

0 – absent    1 – present

**223. Paired mesenteries\***

0 – absent    1 – present

224. Mesentery pair morphology

0 – members the same size    1 – members differ in size

225. Paired secondary cycle

0 – absent    1 – present

**226. Perfect mesenteries\***

This character is added primarily to establish character polarity before scoring the independent character ‘number of perfect mesenteries’. We score the perfect mesenteries as present in *Conicula*, because the presence of perfect mesenteries is presumably contingent on the presence of actinopharynx (**Daly et al., 2003**), a feature appeared in *Conicula*.

0 – absent    1 – present

**227. Perfect mesenteries only\***

This character is adopted from the character ‘Types of mesentery’ of the previous matrix from Zhao et al. (**Zhao et al., 2019**) with only considering the state ‘only perfect mesenteries’.

0 – absent    1 – present

228. Number of perfect mesenteries

0 – eight    1 – six or multiple of six

229. Directive mesentery

In this matrix, we assume the gastric septa of medusozoans are homologous to mesenteries of anthozoans, and therefore rescore this character is absent in scyphozoans and staurozoans rather than inapplicable.

0 – absent    1 – present

230. Number of directive mesentery pairs

0 – one pair    1 – two pairs

231. Gonads on mesenteries of 1st cycle

0 – absent    1 – present

232. Gonads on mesenteries of 2nd and subsequent cycles

0 – absent    1 – present

233. Number of tentacles in polyp

It is challenged to determine the exact number of tentacles in *Conicula*. With the incompletely exposed tentacles can be counted as up to 9, the total number of tentacles in *Conicula* is estimated to more than twenty. The Chengjiang (**Ou et al., 2015**) and Burgess Shale (**Conway Morris and Collins, 1996**) ctenophores lack evidence of tentacles, we rescore the characters that are contingent on the possession of tentacles are all inapplicable in these fossil taxa.

0 – six            1 – eight            2 – twelve  
3 – sixteen    4 – eighteen        5 – more than twenty

234. Structure of polyp tentacles

The polyp tentacle of *Hydra* is now coded as hollow following Ruppert et al. (**Ruppert et al., 2004**). It is unknown the structure of polyp tentacles in *Conicula* and other fossil groups.

0 – hollow    1 – solid



235. Arrangement of tentacles

0 – scattered      1 – one cycle      2 – more than one cycle

236. Two-tentacle polyp stage

0 – absent      1 – present

237. Tentacles retractile

0 – non retractile      1 – retractile

238. Tentacle/coelenteron relationship

0 – one tentacle per endocoel and per exocoel

1 – one tentacle per exocoel, multiple per endocoel

239. Catch tentacles

Catch tentacles is a special type of tentacle longer than ordinary tentacles, probably using for social behaviour, which is only present in *Metridium* (**Williams, 1975**) of our sampled taxa. We score *Conicula* and dinomischids (**Zhao et al., 2019**) as absent for catch tentacles based on its gross appearance of tentacles.

0 – absent      1 – present

240. Acrospheres

0 – absent      1 – present

241. Marginal spherules

0 – absent      1 – holotrichous

242. Acrorhagi

0 – absent      1 – present

243. Organisation of the nervous system

0 – nets      1 – with nerve rings

244. Canal system in polyp

0 – absent    1 – present

245. Gastrodermic musculature

0 – not in bunches

1 – organised in bunches of gastrodermal origin

2 – organised in bunches of ectodermal origin

246. Mesogleal sphincter

0 – absent    1 – present

247. Ectodermal longitudinal muscle location

0 – tentacles and oral disc only      1 – whole body

248. Basilar musculature

0 – absent    1 – present

249. Retractor muscle

0 – weak      1 – defined

250. Parietal muscle

0 – absent    1 – present

251. Mesogleal lacunae

0 – absent    1 – present

## 252. Actinula

This is an easily confused term as it widely uses to describe the free-moving larva stage of Trachymedusae and Anthomedusae, but the two are not homologous (**Bouillon and Boero, 2000; Petersen, 1990**). Here, we refer the character actinula only to the larva stage of Anthomedusae, and accordingly score it present in *Candelabrum* and *Ectopleura* (**Petersen, 1990**).

0 – absent    1 – present

## 253. Ephyrae

The ephyra is a distinguishing characteristic of living scyphozoans and is absent in staurozoans and cubozoans. Based on fossil material, *Olivoooides* may also have an ephyra stage during the development process (**Dong et al., 2013**).

0 – absent    1 – present

## 254. Marginal lappet type\*

The marginal lappet of ephyrae generally comprises two portions (lappet stem and rhopalial lappet) as seen in *Aurelia* and *Rhizostoma*, while the lappet stem is absent in *Linuche*, *Atorella* and *Nausithoe* (**Straehler-Pohl and Jarms, 2010**). It is unknown the type of marginal lappet of *Olivoooides* based on the fossil material.

0 – without lappet stem      1 – with lappet stem

## 255. Number of marginal lappets\*

*Aurelia* and *Rhizostoma* have eight marginal lappets. Coronate *Linuche* and *Nausithoe* have sixteen lappets whereas *Atorella* possesses twelve lappets (**Daly et al., 2007**). *Olivoooides* probably has five lappets (**Dong et al., 2013**).

0 – five      1 – eight

2 – twelve    3 – sixteen

## 256. Medusoid phase

The medusoid phase is one of the biphasic life cycles of cnidarians, referring to the presence of free-living medusa. It is uncertain in *Conicula* as all specimens are in the polypoid phase and the medusoid form is still yet to be determined. Considering the

presence of ephyra (**Dong et al., 2013**), it is therefore scored this character as present in *Olivoooides*.

0 – absent    1 – present

#### 257. Location of medusa formation

Because of the presence of ephyra (**Dong et al., 2013**), we score *Olivoooides* as producing medusa from apical or oral location.

0 – lateral budding from an entocodon  
1 – apical or oral  
2 – direct development without polyp stage

#### 258. Type of apical medusa formation

Unlike the traditional opinion, several cubozoans also have strobilation-like metamorphosis process, such as the newly sampled taxon *Carukia* (**Courtney et al., 2016**). The ephyra is one of the results of strobilation, we score *Olivoooides* as strobilation because of the possible fossil record of ephyra (**Dong et al., 2013**).

0 – strobilation            1 – without transverse fission

#### 259. Strobilation type

Cubozoan *Carukia* produces monodisc strobilation (**Courtney et al., 2016**). *Aurelia*, *Linuche* and *Nausithoe* have polydisc strobilation (**Helm, 2018**), while *Rhizostoma* has both polydisc and monodisc strobilation (**Holst et al., 2007**). *Olivoooides* has two tightly fused ephyrae (**Dong et al., 2013**), probably indicating the presence of polydisc strobilation.

0 – polydisc            1 – monodisc

#### 260. Adult medusoid shape

Although the state '3 – actinuloid' existed in the previous matrix, none of taxa has been scored as 'actinuloid' (**Zhao et al., 2019**). Here a new taxon *Halammohydra* is added into the sampled taxa, and is scored as the presence of actinuloid (**Clausen, 1967**).

0 – bell            1 – pyramidal

2 – cubic      3 – actinuloid

261. Shape of horizontal cross-section of the medusa

0 – circular    1 – four-part symmetry

262. Development of the umbrella

The sampled taxa in previous matrix (**Zhao et al., 2019**) were all coded as present for a fully developed umbrella except the score of inapplicable and unknown. Here we add a new taxon *Halammohydra*, of which the medusa develops only the aboral cone (**Clausen, 1967**).

0 – fully developed    1 – aboral cone

**263. Umbrellar size\***

Scyphomedusa is named as the ‘true jellyfishes’ that have a well-developed umbrella up to 2 metres (e.g. *Cyanea*), while hydromedusa is mostly small. Cubomedusa and stauromedusa are also small compared with scyphomedusa, but is larger than hydromedusa (**Brusca et al., 2016**).

0 – mostly small (up to 10cm in diameter)

1 – small (up to 30cm in diameter)

2 – big (up to 2m in diameter)

264. Umbrellar margin

0 – smooth and continuous    0 – lobed

265. Rhopalia/rhopalioids

0 – absent    1 – present

266. Complex eyes in rhopalia

0 – absent    1 – present



267. Statocysts

0 – absent    1 – present

268. Statocyst origin

0 – endodermic    1 – ectodermic

269. Statolith composition

0 – MgCaPO<sub>4</sub>    1 – CaSO<sub>4</sub>

270. Ocelli in medusa

0 – absent    1 – present

271. Giant fibre nerve net (GFNN) in medusae

The character was duplicated in the previous matrix (characters 23, 147 and 258) (**Zhao et al., 2019**), and here we score it inapplicable in *Hydra* and *Candelabrum* because of the absence of the medusoid phase.

0 – absent    1 – present

272. Nerve ring in medusa

0 – absent    1 – present

273. Number of rings in nerve ring

0 – one    1 – two

274. Manubrium

0 – absent    1 – present

275. Gastric filaments

0 – absent    1 – present

**276. Gastric saccule\***

This new character is widely present in the chirodropids of cubozoans (**Daly et al., 2007**). It is coded as absent in *Carybdea*, *Carukia* and other medusozoans.

0 – absent    1 – present

277. Coronal muscle

0 – well-developed    1 – marginal and tiny

**278. Longitudinal muscles in the peduncle\***

This character is contingent on the presence of peduncle, a character generally present in staurozoans. *Haliclystus* has longitudinal muscles in the peduncle but it is absent in *Craterolophus* (**Miranda et al., 2016**).

0 – absent    1 – present

279. Pedalium of coronate type

0 – absent    1 – present

280. Pedalium of cubozoan type

0 – absent    1 – present

**281. Pedalial branching\***

The branched pedalia bearing numerous tentacles appear in the chirodropids of cubozoans (**Daly et al., 2007**). This new character is present in *Chiropsalmus* (**Gershwin, 2006**) of our sampled taxa.

0 – absent    1 – present

282. Velum

We rescore the velum as absent in *Obelia* (**Bouillon and Boero, 2000**).

0 – absent    1 – present

### 283. Claustrum\*

The claustrum refers to a membrane constituted by layers of mesoglea and gastrodermis that divides the gastric cavity, which is exclusive to some of the staurozoans and is absent in other cnidarians, including the cubozoans (**Miranda et al., 2017**). In our sampled taxa, claustrum is present in *Craterolophus* and is absent in *Haliclystus* (**Miranda et al., 2016**).

0 – absent    1 – present

### 284. Tentacles in medusa

0 – absent    1 – present

### 285. Structure of medusa tentacle

*Obelia* is rescored as the presence of solid marginal tentacles (**Bouillon and Boero, 2000**).

0 – hollow    1 – solid

### 286. Shape of medusa tentacle

0 – filiform    1 – capitate

### 287. Tentacular bulbs

Following the recent studies (**Holst et al., 2021; Miranda et al., 2013; Miranda et al., 2016**), we now score the tentacular bulbs as absent in staurozoans.

0 – absent    1 – present

### 288. Tentacular insertion

0 – at umbrellar margin    1 – away from margin

### 289. Number of tentacular whorls

In the matrix of Zhao et al. (**Zhao et al., 2019**), most medusozoans were coded as one

tentacular whorl, but none of the taxa was scored as present for two tentacular whorls. We now add a new taxon *Halammohydra*, which has two whorls of tentacles (**Clausen, 1967**).

0 – one whorl    1 – two whorls

290. Oral arms with suctorial mouths

0 – absent    1 – present

291. Mesentery in medusa

0 – absent    1 – present

292. Mesenteric shape in medusa

0 – straight    1 – Y-shaped

293. Perradial mesenteries

0 – absent    1 – present

294. Radial canals

0 – absent    1 – present

295. Circular canal

0 – absent    1 – present

296. Circular canal partial

0 – absent    1 – present

297. Peripheral canal system

0 – absent    1 – present

298. Velarium

0 – absent    1 – present

299. Velar canals

0 – absent    1 – present

300. Frenulae

0 – absent    1 – present

301. Coronal furrow

0 – absent    1 – present

302. Gonadal location

Unlike the score in the Zhao et al. (**Zhao et al., 2019**), we add a new state (2 – both sides of gastric septa) to define the gonadal location of staurozoans (**Holst et al., 2021; Miranda et al., 2013**), since the radial canals are absent in staurozoans.

0 – manubrium      1 – radial canals      2 – both sides of gastric septa

303. Urticant rings

0 – absent    1 – present

304. Peronia

0 – absent    1 – present

## SI References

**Babcock LE.** 1991. The enigma of conulariid affinities. In: Simonetta AM, Conway Morris S, eds. *The early evolution of Metazoa and the significance of problematic taxa: Proceedings of an international symposium held at the University of Camerino, 27-31 March 1989*. Cambridge University Press, Cambridge.

**Babcock LE,** Grunow AM, Sadowski GR, Leslie SA. 2005. *Corumbella*, an Ediacaran-grade organism from the Late Neoproterozoic of Brazil. *Palaeogeography, Palaeoclimatology,*



- Palaeoecology* **220**:7–18. doi: 10.1016/j.palaeo.2003.01.001.
- Bengtson S**, Zhao Y. 1997. Fossilized metazoan embryos from the earliest Cambrian. *Science* **277**:1645–1648. doi: 10.1126/science.277.5332.1645.
- Bischoff GCO**. 1989. Byroniida new order from Early Palaeozoic strata of eastern Australia (Cnidaria, thecate scyphopolyps). *Senckenbergiana lethaea* **69**:467–521.
- Botting JP**, Yuan X, Lin JP. 2014. Tetraradial symmetry in early poriferans. *Chinese Science Bulletin* **59**:639–644. doi: 10.1007/s11434-013-0099-z.
- Bouillon J**, Boero F. 2000. Synopsis of the families and genera of the hydromedusae of the world, with a list of the worldwide species. *Thalassia Salentina* **24**:47–296. doi: 10.1285/l15910725V24P47.
- Bouillon J**, Gravili C, Pagès F, Gili J-M, Boero F. 2006. An introduction to Hydrozoa. *Mémoires du Muséum national d'Histoire naturelle* **194**:1–591.
- Brusca RC**, Moore W, Shuster SM. 2016. *Invertebrates, 3rd edn*. Sinauer Associates, Sunderland, Massachusetts.
- Caron J-B**, Conway Morris S, Shu D. 2010. Tentaculate fossils from the Cambrian of Canada (British Columbia) and China (Yunnan) interpreted as primitive deuterostomes. *PloS One* **5**:e9586. doi: 10.1371/journal.pone.0009586.
- Cartwright P**, Halgedahl SL, Hendricks JR, Jarrard RD, Marques AC, Collins AG, Lieberman BS. 2007. Exceptionally preserved jellyfishes from the Middle Cambrian. *PloS One* **2**:e1121. doi: 10.1371/journal.pone.0001121.
- Chang S**, Clausen S, Zhang L, Feng Q, Steiner M, Bottjer DJ, Zhang Y, Shi M. 2018. New probable cnidarian fossils from the lower Cambrian of the Three Gorges area, South China, and their ecological implications. *Palaeogeography, Palaeoclimatology, Palaeoecology* **505**:150–166. doi: 10.1016/j.palaeo.2018.05.039.
- Clausen C**. 1967. Morphological studies of *Halammohydra* Remane (hydrozoa). *Sarsia* **29**:349–370. doi: 10.1080/00364827.1967.10411094.
- Collins AG**, Schuchert P, Marques AC, Jankowski T, Medina M, Schierwater B. 2006. Medusozoan phylogeny and character evolution clarified by new large and small subunit rDNA data and an assessment of the utility of phylogenetic mixture models. *Systematic Biology* **55**:97–115. doi: 10.1080/10635150500433615.
- Conway Morris S**. 1993. Ediacaran-like fossils in Cambrian Burgess Shale-type faunas of North America. *Palaeontology* **36**:593–635.
- Conway Morris S**, Chen M. 1992. Carinachitiids, hexangulaconulariids, and *Punctatus*: problematic metazoans from the Early Cambrian of South China. *Journal of Paleontology* **66**:384–406. doi: 10.1017/S0022336000033953.
- Conway Morris S**, Collins DH. 1996. Middle Cambrian ctenophores from the Stephen Formation, British Columbia, Canada. *Philosophical Transactions of the Royal Society B: Biological Sciences* **351**:279–308. doi: 10.1098/rstb.1996.0024.
- Conway Morris S**, Robison RA. 1988. More soft-bodied animals and algae from the Middle

- Cambrian of Utah and British Columbia. *The University of Kansas Paleontological Contributions: Paper* **122**:1–48.
- Courtney R**, Browning S, Seymour J. 2016. Early life history of the 'Irukandji' jellyfish *Carukia barnesi*. *PloS One* **11**:e0151197. doi: 10.1371/journal.pone.0151197.
- Daly M**. 2002. A systematic revision of Edwardsiidae (Cnidaria, Anthozoa). *Invertebrate Biology* **121**:212–225. doi: 10.1111/j.1744-7410.2002.tb00061.x.
- Daly M**, Brugler MR, Cartwright P, Collins AG, Dawson MN, Fautin DG, France SC, McFadden CS, Opresko DM, Rodriguez E, Romano SL, Stake JL. 2007. The phylum Cnidaria: a review of phylogenetic patterns and diversity 300 years after Linnaeus. *Zootaxa* **1668**:127–182. doi: 10.11646/zootaxa.1668.1.11.
- Daly M**, Fautin DG, Cappola VA. 2003. Systematics of the Hexacorallia (Cnidaria: Anthozoa). *Zoological Journal of the Linnean Society* **139**:419–437. doi: 10.1046/j.1096-3642.2003.00084.x.
- Dong X-P**, Cunningham JA, Bengtson S, Thomas C-W, Liu J, Stampanoni M, Donoghue PCJ. 2013. Embryos, polyps and medusae of the Early Cambrian scyphozoan *Olivoooides*. *Proceedings of the Royal Society B: Biological Sciences* **280**:20130071. doi: 10.1098/rspb.2013.0071.
- Dong X-P**, Vargas K, Cunningham JA, Zhang H, Liu T, Chen F, Liu J, Bengtson S, Donoghue PCJ. 2016. Developmental biology of the early Cambrian cnidarian *Olivoooides*. *Palaeontology* **59**:387–407. doi: 10.1111/pala.12231.
- Duan B**, Dong X-P, Porras L, Vargas K, Cunningham JA, Donoghue PCJ. 2017. The early Cambrian fossil embryo *Pseudoooides* is a direct-developing cnidarian, not an early ecdysozoan. *Proceedings of the Royal Society B: Biological Sciences* **284**:20172188. doi: 10.1098/rspb.2017.2188.
- Dunn CW**, Hejnol A, Matus DQ, Pang K, Browne WE, Smith SA, Seaver E, Rouse GW, Obst M, Edgecombe GD, Sørensen MV, Haddock SHD, Schmidt-Rhaesa A, Okusu A, Kristensen RM, Wheeler WC, Martindale MQ, Giribet G. 2008. Broad phylogenomic sampling improves resolution of the animal tree of life. *Nature* **452**:745–749. doi: 10.1038/nature06614.
- Dzik J**, Baliński A, Sun Y. 2017. The origin of tetradial symmetry in cnidarians. *Lethaia* **50**:306–321. doi: 10.1111/let.12199.
- Fatka O**, Kraft P, Szabad M. 2012. A first report of *Sphenothallus* Hall, 1847 in the Cambrian of Variscan Europe. *Comptes Rendus Palevol* **11**:539–547. doi: 10.1016/j.crpv.2012.03.003.
- Fu D**, Tong G, Dai T, Liu W, Yang Y, Zhang Y, Cui L, Li L, Yun H, Wu Y, Sun A, Liu C, Pei W, Gaines RR, Zhang X. 2019. The Qingjiang biota-A Burgess Shale-type fossil Lagerstätte from the early Cambrian of South China. *Science* **363**:1338–1342. doi: 10.1126/science.aau8800.
- Gehling JG**. 1988. A cnidarian of actinian-grade from the Ediacaran Pound Subgroup, South Australia. *Alcheringa* **12**:299–314. doi: 10.1080/03115518808619129.
- Gershwin L**. 2006. Comments on *Chiropsalmus* (Cnidaria: Cubozoa: Chiropodida): a preliminary revision of the Chiropsalmidae, with descriptions of two new genera and two new species. *Zootaxa* **1231**:1–42. doi: 10.11646/zootaxa.1231.1.1.
- Geyer G**, Peel JS, Streng M, Voigt S, Fischer J, Preuße M. 2014. A remarkable Amgan (Middle

- Cambrian, Stage 5) fauna from the Sauk Tanga, Madygen region, Kyrgyzstan. *Bulletin of Geosciences* **89**:375–400. doi: 10.3140/bull.geosci.1434.
- Grazhdankin D.** 2000. The Ediacaran genus *Inaria*: a taphonomic/morphodynamic analysis. *Neues Jahrbuch für Geologie und Paläontologie - Abhandlungen* **216**:1–34. doi: 10.1127/njgpa/216/2000/1.
- Guo J, Han J, Van Iten H, Song Z, Qiang Y, Wang W, Zhang Z, Li G.** 2021. A ten-faced hexangulaconulariid from Cambrian Stage 2 of South China. *Journal of Paleontology*. doi: 10.1017/jpa.2021.25.
- Guo J, Han J, Van Iten H, Song Z, Qiang Y, Wang W, Zhang Z, Li G, Sun Y, Sun J.** 2020a. A new tetradial olivoid (Medusozoa) from the lower Cambrian (Stage 2) Yanjiahe Formation, South China. *Journal of Paleontology* **94**:457–466. doi: 10.1017/jpa.2019.101.
- Guo J, Han J, Van Iten H, Wang X, Qiang Y, Song Z, Wang W, Zhang Z, Li G.** 2020b. A fourteen-faced hexangulaconulariid from the early Cambrian (Stage 2) Yanjiahe Formation, South China. *Journal of Paleontology* **94**:45–55. doi: 10.1017/jpa.2019.56.
- Hahn G, Hahn R, Leonardos OH, Pflug HD, Walde DH-G.** 1982. Körperlich erhaltene Scyphozoen-Reste aus dem Jungpräkambrium Brasiliens. *Geologica et palaeontologica* **16**:1–18.
- Han J, Hu S, Cartwright P, Zhao F, Ou Q, Kubota S, Wang X, Yang X.** 2016a. The earliest pelagic jellyfish with rhopalia from Cambrian Chengjiang Lagerstätte. *Palaeogeography, Palaeoclimatology, Palaeoecology* **449**:166–173. doi: 10.1016/j.palaeo.2016.02.025.
- Han J, Kubota S, Li G, Ou Q, Wang X, Yao X, Shu D, Li Y, Uesugi K, Hoshino M, Sasaki O, Kano H, Sato T, Komiya T.** 2016b. Divergent evolution of medusozoan symmetric patterns: Evidence from the microanatomy of Cambrian tetramerous cubozoans from South China. *Gondwana Research* **31**:150–163. doi: 10.1016/j.gr.2015.01.003.
- Han J, Kubota S, Li G, Yao X, Yang X, Shu D, Li Y, Kinoshita S, Sasaki O, Komiya T, Yan G.** 2013. Early Cambrian pentamerous cubozoan embryos from South China. *PLoS One* **8**:e70741. doi: 10.1371/journal.pone.0070741.
- Han J, Kubota S, Uchida H, Stanley GD, Jr., Yao X, Shu D, Li Y, Yasui K.** 2010. Tiny sea anemone from the lower Cambrian of China. *PLoS One* **5**:e13276. doi: 10.1371/journal.pone.0013276.
- Han J, Li G, Wang X, Yang X, Guo J, Sasaki O, Komiya T.** 2018. *Olivoides*-like tube aperture in early Cambrian carinachitids (Medusozoa, Cnidaria). *Journal of Paleontology* **92**:3–13. doi: 10.1017/jpa.2017.10.
- Helm RR.** 2018. Evolution and development of scyphozoan jellyfish. *Biological Reviews* **93**:1228–1250. doi: 10.1111/brv.12393.
- Holst S, Miranda LS, Meyer P, Michalik P, Sötje I.** 2021. Morphological analyses of the adult and juvenile stages of the stalked jellyfish *Craterolophus convolvulus* (Johnston, 1835) (Cnidaria: Staurozoa: Stauromedusae: Craterolophidae) using micro-CT. *Zoologischer Anzeiger* **292**:240–260. doi: 10.1016/j.jcz.2021.04.005.
- Holst S, Sötje I, Tiemann H, Jarms G.** 2007. Life cycle of the rhizostome jellyfish *Rhizostoma octopus* (L.) (Scyphozoa, Rhizostomeae), with studies on cnidocysts and statoliths. *Marine*

- Biology* **151**:1695–1710. doi: 10.1007/s00227-006-0594-8.
- Hou X**, Bergström J, Wang H, Feng X, Chen A. 1999. *The Chengjiang Fauna: exceptionally well-preserved animals from 530 million years ago*. Yunnan Science and Technology Press, Kunming.
- Hou X-G**, Stanley GD, Jr., Zhao J, Ma X-Y. 2005. Cambrian anemones with preserved soft tissue from the Chengjiang biota, China. *Lethaia* **38**:193–203. doi: 10.1080/00241160510013295.
- Hu S**. 2005. *Taphonomy and palaeoecology of the early Cambrian Chengjiang biota from Eastern Yunnan, China*. Freie Universität Berlin, Berlin.
- Hu S**, Steiner M, Zhu M, Erdtmann B-D, Luo H, Chen L, Weber B. 2007. Diverse pelagic predators from the Chengjiang Lagerstätte and the establishment of modern-style pelagic ecosystems in the early Cambrian. *Palaeogeography, Palaeoclimatology, Palaeoecology* **254**:307–316. doi: 10.1016/j.palaeo.2007.03.044.
- Hughes NC**, Gundersen GO, Weedon MJ. 2000. Late Cambrian conulariids from Wisconsin and Minnesota. *Journal of Paleontology* **74**:828–838. doi: 10.1017/S0022336000033035.
- Ivantsov AY**, Fedonkin MA. 2002. Conulariid-like fossil from the Vendian of Russia: a metazoan clade across the Proterozoic/Palaeozoic boundary. *Palaeontology* **45**:1219–1229. doi: 10.1111/1475-4983.00283.
- Jarms G**. 1991. Taxonomic characters from the polyp tubes of coronate medusae (Scyphozoa, Coronatae). *Hydrobiologia* **216/217**:463–470. doi: 10.1007/BF00026500.
- Jarms G**, Morandini AC, da Silveira FL. 2002. Polyps of the families Atorellidae and Nausithoidae (Scyphozoa: Coronatae) new to the Brazilian fauna. *Biota Neotropica* **2**:1–11. doi: 10.1590/s1676-06032002000100004.
- Jerre F**. 1994. Anatomy and phylogenetic significance of *Eoconularia loculata*, a conulariid from the Silurian of Gotland. *Lethaia* **27**:97–109. doi: 10.1111/j.1502-3931.1994.tb01562.x.
- Kayal E**, Bentlage B, Sabrina Pankey M, Ohdera AH, Medina M, Plachetzki DC, Collins AG, Ryan JF. 2018. Phylogenomics provides a robust topology of the major cnidarian lineages and insights on the origins of key organismal traits. *BMC Evolutionary Biology* **18**:68. doi: 10.1186/s12862-018-1142-0.
- Kouchinsky A**, Bengtson S, Feng W, Kutugin R, Val'kov A. 2009. The lower Cambrian fossil anabaritids: Affinities, occurrences and systematics. *Journal of Systematic Palaeontology* **7**:241–298. doi: 10.1017/S1477201909002715.
- Lam J**, Cheng Y-W, Chen W-NU, Li H-H, Chen C-S, Peng S-E. 2017. A detailed observation of the ejection and retraction of defense tissue acontia in sea anemone (*Exaiptasia pallida*). *PeerJ* **5**:e2996. doi: 10.7717/peerj.2996.
- Lei Q-P**, Han J, Ou Q, Wan X-Q. 2014. Sedentary habits of anthozoa-like animals in the Chengjiang Lagerstätte: Adaptive strategies for Phanerozoic-style soft substrates. *Gondwana Research* **25**:966–974. doi: 10.1016/j.gr.2013.01.007.
- Leme JdM**, Guimarães Simões M, Marques AC, Van Iken H. 2008a. Cladistic analysis of the suborder Conulariina Miller and Gurley, 1896 (Cnidaria, Scyphozoa; Vendian–Triassic). *Palaeontology* **51**:649–662. doi: 10.1111/j.1475-4983.2008.00775.x.

- Leme JdM**, Simoes MG, Rodrigues SC, Van Iten H, Marques AC. 2008b. Major developments in conulariid research: problems of interpretation and future perspectives. *Ameghiniana* **45**:407–420.
- Lerosey-Aubril R**, Gaines RR, Hegna TA, Ortega-Hernández J, Van Roy P, Kier C, Bonino E. 2018. The Weeks Formation Konservat-Lagerstätte and the evolutionary transition of Cambrian marine life. *Journal of the Geological Society* **175**:705–715. doi: 10.1144/jgs2018-042.
- Li G-X**, Zhu M-Y, Van Iten H, Li C-W. 2004. Occurrence of the earliest known *Sphenothallus* Hall in the Lower Cambrian of Southern Shaanxi Province, China. *Geobios* **37**:229–237. doi: 10.1016/j.geobios.2003.04.002.
- Liu, A. G., Matthews, J. J., Menon, L. R., McIlroy, D., Brasier, M. D.** 2014. *Haootia quadriformis* n. gen., n. sp., interpreted as a muscular cnidarian impression from the Late Ediacaran period (approx. 560 Ma). *Proceedings of the Royal Society B: Biological Sciences* **281**:20141202. doi: 10.1098/rspb.2014.1202.
- Liu, Y., Li, Y., Shao, T., Zhang, H., Wang, Q., Qiao, J.** 2014a. *Quadrapyrgites* from the lower Cambrian of South China: growth pattern, post-embryonic development, and affinity. *Chinese Science Bulletin* **59**:4086–4095. doi: 10.1007/s11434-014-0481-5.
- Liu Y**, Shao T, Zhang H, Wang Q, Zhang Y, Chen C, Liang Y, Xue J. 2017. A new scyphozoan from the Cambrian Fortunian Stage of South China. *Palaeontology* **60**:511–518. doi: 10.1111/pala.12306.
- Liu, Y., Xiao, S., Shao, T., Broce, J., Zhang, H.** 2014b. The oldest known priapulid-like scalidophoran animal and its implications for the early evolution of cycloneuralians and ecdysozoans. *Evolution & Development* **16**:155–165. doi: 10.1111/ede.12076.
- López-González PJ**, Ocaña O, García-Gómez JC, Núñez J. 1995. North-eastern Atlantic and Mediterranean species of Cornulariidae Dana, 1846 (Anthozoa: Stolonifera) with the description of a new genus. *Zoologische Mededelingen* **69**:261–272.
- Luo H**, Hu S, Chen L, Zhang S, Tao Y. 1999. *Early Cambrian Chengjiang fauna from Kunming region, China*. Yunnan Science and Technology Press, Kunming.
- Manuel M.** 2009. Early evolution of symmetry and polarity in metazoan body plans. *Comptes Rendus Biologies* **332**:184–209. doi: 10.1016/j.crv.2008.07.009.
- Marques AC**, Collins AG. 2004. Cladistic analysis of Medusozoa and cnidarian evolution. *Invertebrate Biology* **123**:23–42. doi: 10.1111/j.1744-7410.2004.tb00139.x.
- McFadden CS**, Quattrini AM, Brugler MR, Cowman PF, Dueñas LF, Kitahara MV, Paz-García DA, Reimer JD, Rodríguez E. 2021. Phylogenomics, Origin, and Diversification of Anthozoans (Phylum Cnidaria). *Systematic Biology* **70**:635–647. doi: 10.1093/sysbio/syaa103.
- Mendoza-Becerril MA**, Maronna MM, Pacheco MLAF, Simões MG, Leme JM, Miranda LS, Morandini AC, Marques AC. 2016. An evolutionary comparative analysis of the medusozoan (Cnidaria) exoskeleton. *Zoological Journal of the Linnean Society* **178**:206–225. doi: 10.1111/ZOJ.12415.
- Millard NAH.** 1975. Monograph on the Hydroida of Southern Africa. *Annals of the South African Museum* **68**:1–513.



- Miranda LS**, Collins AG, Marques AC. 2013. Internal anatomy of *Haliclystus antarcticus* (Cnidaria, Staurozoa) with a discussion on histological features used in staurozoan taxonomy. *Journal of Morphology* **274**:1-19. doi: 10.1002/jmor.20231.
- Miranda LS**, García-Rodríguez J, Collins AG, Morandini AC, Marques AC. 2017. Evolution of the claustrum in Cnidaria: comparative anatomy reveals that it is exclusive to some species of Staurozoa and absent in Cubozoa. *Organisms Diversity & Evolution* **17**:753–766. doi: 10.1007/s13127-017-0342-6.
- Miranda LS**, Hirano YM, Mills CE, Falconer A, Fenwick D, Marques AC, Collins AG. 2016. Systematics of stalked jellyfishes (Cnidaria: Staurozoa). *PeerJ* **4**:e1951. doi: 10.7717/peerj.1951.
- Moore RC**, ed. 1956. *Treatise on Invertebrate Paleontology: Part F, Coelenterata*. The Geological Society of America & The University of Kansas, Boulder & Lawrence.
- Muscente AD**, Xiao S. 2015. New occurrences of *Sphenothallus* in the lower Cambrian of South China: Implications for its affinities and taphonomic demineralization of shelly fossils. *Palaeogeography, Palaeoclimatology, Palaeoecology* **437**:141–164. doi: 10.1016/j.palaeo.2015.07.041.
- Ou Q**, Han J, Zhang Z, Shu D, Sun G, Mayer G. 2017. Three Cambrian fossils assembled into an extinct body plan of cnidarian affinity. *Proceedings of the National Academy of Sciences of the United States of America* **114**:8835–8840. doi: 10.1073/pnas.1701650114.
- Ou Q**, Xiao S, Han J, Sun G, Zhang F, Zhang Z, Shu D. 2015. A vanished history of skeletonization in Cambrian comb jellies. *Science Advances* **1**:e1500092. doi: 10.1126/sciadv.1500092.
- Pacheco MLAF**, Galante D, Rodrigues F, Leme JdM, Bidola P, Hagadorn W, Stockmar M, Herzen J, Rudnitzki ID, Pfeiffer F, Marques AC. 2015. Insights into the skeletonization, lifestyle, and affinity of the unusual Ediacaran fossil *Corumbella*. *PloS One* **10**:e0114219. doi: 10.1371/journal.pone.0114219.
- Pacheco MLAF**, Leme J, Machado A. 2011. Taphonomic Analysis and Geometric Modelling for the Reconstitution of the Ediacaran Metazoan *Corumbella weneri* Hahn et al. 1982 (Tamengo Formation, Corumbá Basin, Brazil). *Journal of Taphonomy* **9**:269–283.
- Park T**, Woo J, Lee D-J, Lee D-C, Lee S, Han Z, Chough SK, Choi DK. 2011. A stem-group cnidarian described from the mid-Cambrian of China and its significance for cnidarian evolution. *Nature Communications* **2**:442. doi: 10.1038/ncomms1457.
- Park T-YS**, Kihm J-H, Woo J, Zhen Y-Y, Engelbretsen M, Hong J, Choh S-J, Lee D-J. 2016. Cambrian stem-group cnidarians with a new species from the Cambrian Series 3 of the Taebaeksan Basin, Korea. *Acta Geologica Sinica-English Edition* **90**:827–837. doi: 10.1111/1755-6724.12726.
- Peel JS**. 2017. A problematic cnidarian (*Cambroctoconus* ; Octocorallia?) from the Cambrian (Series 2-3) of Laurentia. *Journal of Paleontology* **91**:871–882. doi: 10.1017/jpa.2017.49.
- Peng J**, Babcock LE, Zhao Y, Wang P, Yang R. 2005. Cambrian *Sphenothallus* from Guizhou Province, China: early sessile predators. *Palaeogeography, Palaeoclimatology, Palaeoecology* **220**:119–127. doi: 10.1016/j.palaeo.2004.09.014.

- Petersen KW.** 1990. Evolution and taxonomy in capitate hydroids and medusae (Cnidaria: Hydrozoa). *Zoological Journal of the Linnean Society* **100**:101–231. doi: 10.1111/j.1096-3642.1990.tb01862.x.
- Pisani D,** Pett W, Dohrmann M, Feuda R, Rota-Stabelli O, Philippe H, Lartillot N, Wörheide G. 2015. Genomic data do not support comb jellies as the sister group to all other animals. *Proceedings of the National Academy of Sciences of the United States of America* **112**:15402–15407. doi: 10.1073/pnas.1518127112.
- Reft AJ,** Daly M. 2012. Morphology, distribution, and evolution of apical structure of nematocysts in Hexacorallia. *Journal of Morphology* **273**:121–136. doi: 10.1002/jmor.11014.
- Ronquist F,** Teslenko M, van der Mark P, Ayres DL, Darling A, Höhna S, Larget B, Liu L, Suchard MA, Huelsenbeck JP. 2012. MrBayes 3.2: efficient Bayesian phylogenetic inference and model choice across a large model space. *Systematic Biology* **61**:539–542. doi: 10.1093/sysbio/sys029.
- Ruppert EE,** Fox RS, Barnes RD. 2004. *Invertebrate zoology: A functional evolutionary approach, 7th edn.* Thomson-Brooks/Cole, Belmont, CA.
- Shao T,** Liu Y, Duan B, Zhang H, Zhang H, Wang Q, Zhang Y, Qin J. 2018. The Fortunian (lowermost Cambrian) *Qinncyphus necopinus* (Cnidaria, Scyphozoa, Coronatae) underwent direct development. *Neues Jahrbuch für Geologie und Paläontologie - Abhandlungen* **289**:149–159. doi: 10.1127/njgpa/2018/0755.
- Shu D,** Conway Morris S. 2006. New Diploblasts from Chengjiang fossil Lagerstätte. *Earth Science Frontiers* **13**:227–233.
- Simion P,** Philippe H, Baurain D, Jager M, Richter DJ, Di Franco A, Roure B, Satoh N, Quéinnec É, Ereskovsky A, Lapébie P, Corre E, Delsuc F, King N, Wörheide G, Manuel M. 2017. A large and consistent phylogenomic dataset supports sponges as the sister group to all other animals. *Current Biology* **27**:958–967. doi: 10.1016/j.cub.2017.02.031.
- Song X,** Ruthensteiner B, Lyu M, Liu X, Wang J, Han J. 2021. Advanced Cambrian hydroid fossils (Cnidaria: Hydrozoa) extend the medusozoan evolutionary history. *Proceedings of the Royal Society B: Biological Sciences* **288**:20202939. doi: 10.1098/rspb.2020.2939.
- Steiner M,** Li G, Qian Y, Zhu M. 2004. Lower Cambrian Small Shelly Fossils of northern Sichuan and southern Shaanxi (China), and their biostratigraphic importance. *Geobios* **37**:259–275. doi: 10.1016/j.geobios.2003.08.001.
- Steiner M,** Qian Y, Li G, Hagadorn JW, Zhu M. 2014. The developmental cycles of early Cambrian Olivooidea fam. nov. (?Cycloneuralia) from the Yangtze Platform (China). *Palaeogeography, Palaeoclimatology, Palaeoecology* **398**:97–124. doi: 10.1016/j.palaeo.2013.08.016.
- Straehler-Pohl I,** Jarms G. 2010. Identification key for young ephyrae: a first step for early detection of jellyfish blooms. *Hydrobiologia* **645**:3–21. doi: 10.1007/s10750-010-0226-7.
- Straehler-Pohl I,** Jarms G. 2011. Morphology and life cycle of *Carybdea morandinii*, sp. nov. (Cnidaria), a cubozoan with zooxanthellae and peculiar polyp anatomy. *Zootaxa* **2755**:36–56. doi: 10.11646/zootaxa.2755.1.2.

- Van Iten H.** 1992a. Microstructure and growth of the conulariid test: implications for conulariid affinities. *Palaeontology* **35**:359–372.
- Van Iten H.** 1992b. Morphology and phylogenetic significance of the corners and midlines of the conulariid test. *Palaeontology* **35**:335–358.
- Van Iten H, Leme JdM, Marques AC, Simões MG.** 2013. Alternative interpretations of some earliest Ediacaran fossils from China. *Acta Palaeontologica Polonica* **58**:111–113. doi: 10.4202/app.2011.0096.
- Van Iten H, Leme JM, Pacheco MLAF, Simões MG, Fairchild TR, Rodrigues F, Galante D, Boggiani PC, Marques AC.** 2016. Origin and early diversification of Phylum Cnidaria: key macrofossils from the Ediacaran system of North and South America. In: Goffredo S, Dubinsky Z, eds. *The Cnidaria, Past, Present and Future: the world of Medusa and her sisters*. Springer, Cham.
- Van Iten H, Moraes Leme J de, Simões MG, Marques AC, Collins AG.** 2006. Reassessment of the phylogenetic position of conulariids (?Ediacaran - Triassic) within the subphylum medusozoa (phylum cnidaria). *Journal of Systematic Palaeontology* **4**:109–118. doi: 10.1017/S1477201905001793.
- Van Iten H, Zhu M, Li G.** 2010. Redescription of *Hexaconularia* He and Yang, 1986 (Lower Cambrian, South China): implications for the affinities of conulariid-like small shelly fossils. *Palaeontology* **53**:191–199. doi: 10.1111/j.1475-4983.2009.00925.x.
- Van Iten H, Zhu M-Y, Collins D.** 2002. First report of *Sphenothallus* Hall, 1847 in the middle Cambrian. *Journal of Paleontology* **76**:902–905. doi: 10.1017/S0022336000037562.
- Vaziri SH, Majidifard MR, Laflamme M.** 2018. Diverse Assemblage of Ediacaran fossils from Central Iran. *Scientific Reports* **8**:5060. doi: 10.1038/s41598-018-23442-y.
- Walcott CD.** 1911. Cambrian Geology and Paleontology II: No. 3-Middle Cambrian holothurians and medusae. *Smithsonian Miscellaneous Collections* **57**:41–68.
- Walde DH-G, Weber B, Erdtmann B-D, Steiner M.** 2019. Taphonomy of *Corumbella weneri* from the Ediacaran of Brazil: sinotubulitid tube or conulariid test? *Alcheringa* **43**:335–350. doi: 10.1080/03115518.2019.1615551.
- Wan B, Yuan X, Chen Z, Guan C, Pang K, Tang Q, Xiao S.** 2016. Systematic description of putative animal fossils from the early Ediacaran Lantian Formation of South China. *Palaeontology* **59**:515–532. doi: 10.1111/pala.12242.
- Wang X, Han J, Vannier J, Ou Q, Yang X, Uesugi K, Sasaki O, Komiya T.** 2017. Anatomy and affinities of a new 535-million-year-old medusozoan from the Kuanchuanpu Formation, South China. *Palaeontology* **60**:853–867. doi: 10.1111/pala.12320.
- Wang X, Vannier J, Yang X, Kubota S, Ou Q, Yao X, Uesugi K, Sasaki O, Komiya T, Han J.** 2020. An intermediate type of medusa from the early Cambrian Kuanchuanpu Formation, South China. *Palaeontology* **63**:775–789. doi: 10.1111/pala.12483.
- Weinberg S.** 1978. Revision of the common Octocorallia of the Mediterranean circalittoral. III. Stoloniifera. *Beaufortia* **27**:139–176.
- Werner B.** 1973. New investigations on systematics and evolution of the Class Scyphozoa and the Phylum Cnidaria. *Publications of the Seto Marine Biological Laboratory* **20**:35–61.

- Whelan NV**, Kocot KM, Moroz TP, Mukherjee K, Williams P, Paulay G, Moroz LL, Halanych KM. 2017. Ctenophore relationships and their placement as the sister group to all other animals. *Nature Ecology & Evolution* **1**:1737–1746. doi: 10.1038/s41559-017-0331-3.
- Williams RB**. 1975. Catch-tentacles in sea anemones: occurrence in *Haliplanella luciae* (Verrill) and a review of current knowledge. *Journal of Natural History* **9**:241–248. doi: 10.1080/00222937500770161.
- Zapata F**, Goetz FE, Smith SA, Howison M, Siebert S, Church SH, Sanders SM, Ames CL, McFadden CS, France SC, Daly M, Collins AG, Haddock SHD, Dunn CW, Cartwright P. 2015. Phylogenomic analyses support traditional relationships within Cnidaria. *PloS One* **10**:e0139068. doi: 10.1371/journal.pone.0139068.
- Zhang W**, Babcock LE. 2001. New extraordinarily preserved enigmatic fossils, possibly with Ediacaran affinities, from the Lower Cambrian of Yunnan, China. *Acta Palaeontologica Sinica* **40**:201–213.
- Zhao Y**, Vinther J, Parry LA, Wei F, Green E, Pisani D, Hou X, Edgecombe GD, Cong P. 2019. Cambrian sessile, suspension feeding stem-group ctenophores and evolution of the comb jelly body plan. *Current Biology* **29**:1112-1125. e2. doi: 10.1016/j.cub.2019.02.036.
- Zhu M-Y**, Van Iten H, Cox RS, Zhao Y-L, Erdtmann B-D. 2000. Occurrence of *Byronia* Matthew and *Sphenothallus* Hall in the Lower Cambrian of China. *Paläontologische Zeitschrift* **74**:227–238. doi: 10.1007/BF02988098.
